# Bioactive exometabolites drive maintenance competition in simple bacterial communities

John L. Chodkowski<sup>1</sup> and Ashley Shade<sup>1,2,3\*</sup>

<sup>1</sup>Department of Microbiology and Molecular Genetics, Michigan State University, East Lansing, MI 48824, USA

<sup>2</sup>Department of Plant, Soil and Microbial Sciences, Michigan State University, East Lansing, MI 48824, USA

<sup>3</sup>Program in Ecology, Evolutionary Biology and Behavior, Michigan State University, 10 East Lansing, MI 48824, USA

\* Corresponding author and material requests. Email: [shadeash@msu.edu](mailto:shadeash@msu.edu); ORCID: 0000-0002-7189-3067

## Abstract

During prolonged resource limitation, bacterial cells can persist in metabolically active states of non-growth. These maintenance periods, such as those experienced by cells in stationary phase cultures, can, perhaps counterintuitively, include upregulation of cellular secondary metabolism and release of exometabolites into the local environment, at the cost of an energetic commitment to growth. As resource limitation is a characteristic feature of many habitats that harbor environmental microbial communities, we hypothesized that neighboring bacterial populations employ exometabolites to compete or cooperate during maintenance, and that these

exometabolite-facilitated interactions can drive community outcomes. Here, we evaluated the consequences of exometabolite interactions over stationary phase among three well-known environmental bacterial strains: *Burkholderia thailandensis* E264 (ATCC 700388), *Chromobacterium violaceum* ATCC 31532, and *Pseudomonas syringae* pv.*tomato* DC3000 (ATCC BAA-871). We assembled these strains into laboratory-scale synthetic communities that only permitted chemical interactions among them. We compared the responses (transcripts) and behaviors (exometabolites) of each member with and without neighbors. We found that transcriptional dynamics were altered in the presence of different neighbors, and that these changes could be attributed to the production of or response to bioactive exometabolites employed for competition during maintenance. *B. thailandensis* was especially influential and competitive within its communities, as it consistently upregulated additional biosynthetic gene clusters involved in the production of bioactive exometabolites for both exploitative and interference competition. Additionally, some of these bioactive exometabolites were upregulated and produced in a non-additive manner in the 3-member community. These results demonstrate that the active investment in competition during maintenance can contribute to both bacterial population fitness and community-level outcomes. It also suggests that the traditional concept of defining competitiveness by growth outcomes may be too narrow, and that maintenance competition could be an alternative measure.

## Introduction

Bacteria interact with other bacteria and their environment within complex, multi-species communities. Bacterial interactions rely on the ability to sense and respond to both biotic and abiotic stimuli (Stock et al., 2000; Browning and Busby, 2004). These stimuli include physical, chemical or molecular cues, and can alter bacterial behaviors (Pietschke et al., 2017; Garren et al., 2016), and ultimately, can also alter community functioning (Kato et al., 2005; Steinweg et al., 2013). It is expected that interspecies interactions play an important role in shaping microbial community dynamics (Aziz et al., 2015). However, multiple stimuli in the environment make it difficult to disentangle the separate influences of abiotic versus biotic stimuli on microbial community dynamics (Orr et al., 2020). Therefore, efforts to characterize and distinguish community responses to biotic stimuli, such as those that facilitate interspecies interactions, will provide insights into the specific roles that microbial interactions play in shaping their communities (Little et al., 2008).

Interspecies interactions can be facilitated through small molecules (Phelan et al., 2011). Extracellular small molecules are collectively referred to as exometabolites (Kell et al., 2005; Pinu; Silva and Northen, 2015; Villas-Boas, 2017). Depending on the exometabolite produced, these molecules can mediate interspecies interactions that range from competitive to cooperative (Großkopf and Soyer, 2014). Of these interaction types, competition has been shown to have a major influence in structuring microbial communities (e.g., Foster and Bell, 2012; Coyte et al., 2015; Hibbing et al. 2010). Thus, competitive interactions that are mediated by exometabolites are also expected to influence to microbial community dynamics. In addition, different types of

exometabolites can be employed by bacteria to gain advantage in both exploitative (e.g. nutrient scavenging) and interference (direct cell damage) categories of competition.

Traditionally, competition has been viewed through the lens of resource acquisition (Tilman, 1986). In these studies, competitiveness is modeled with respect to yield given resource consumption and growth (Stewart and Levin, 1973; Smith, 2011). However, competition for *survival* or *maintenance* may be just as important as competition for yield, especially during periods of resource limitation (Pekkonen et al., 2011; Holt, 2008). Competition during maintenance is likely common in some free-living environments, such as soils, sequencing batch reactors, and the human gut that experience long periods of nutrient famine punctuated by short periods of nutrient influx (Schimel, 2018; Chiesa et al., 1985; Fetissov, 2017; Hiltunen et al., 2008). The stationary phase of a bacterial growth curve falls within this context of growth cessation, and pulses of nutrients may be transiently available as cells die and lyse (necromass), while the total population size remains stagnant. Stationary phase is often coordinated with a metabolic shift to secondary metabolism (Navarro Llorens et al., 2010; Čihák et al., 2017). Therefore, an effective “maintenance” competitor may produce bioactive exometabolites, like antibiotics, which are often produced as a result of secondary metabolism. In particular, bacteria can activate biosynthetic gene clusters (BSGCs) to produce bioactive exometabolites (Medema et al., 2015). The activation of BSGCs is closely tied to stress responses, suggesting that bacteria can sense the stress of competition (Cornforth and Foster, 2013; Okada and Seyedsayamdost, 2017). While it is known that certain exometabolites can trigger BSGC upregulation and, more generally alter transcription (Goh et al., 2002), there is much to understand about the

outcomes of interspecies interactions for BSGCs in multi-member microbial communities.

Here, we build on our previous research to understand how exometabolite-mediated interactions among bacterial neighbors contribute to community outcomes in a simple, three-member community (Table 1). These three members are commonly associated with terrestrial environments (soils or plants) and were chosen because of reported (Chandler et al., 2012) and observed interspecies exometabolite interactions in the laboratory. We used a synthetic community (“SynCom”) approach (De Roy et al., 2014) by applying our previously described transwell system (Chodkowski and Shade, 2017), which allowed for evaluation of “community goods” within a media reservoir that was shared among members. The members’ populations were physically isolated by membrane filters at the bottom of each transwell, but could interact chemically via the reservoir. In our prior work, we investigated each member’s exometabolites and transcription over stationary phase, and the objective was to understand monoculture responses (in minimal glucose media) before assembling the more complex 2- and 3-member communities. We found that each member in monoculture produced a variety of exometabolites in stationary phase, including bioactive molecules involved in competition (Chodkowski and Shade, 2020). In this work, we build to 2- and 3- member arrangements to ask: How do members interact via exometabolites in simple communities during maintenance (stationary phase), and what are the competitive strategies and outcomes of those interactions? What genetic pathways, molecules, and members drive the responses? Which outcomes in 3-member community are predicted by the 2-member communities, and which are “greater than the sum of its parts”?

We found that *B. thailandensis* had a major influence on the transcriptional responses of both *C. violaceum* and *P. syringae*, and that this influence could be attributed to an increase in both interference and exploitative competition strategies. Furthermore, we observed non-additive transcriptional responses and exometabolite production, particularly for *B. thailandensis* with respect to BSGCs. These findings show that diverse competitive strategies can be deployed even when bacterial neighbors are surviving rather than exponentially growing. Therefore, we suggest that contact-independent, exometabolite-mediated interference and exploitation are important competitive strategies in resource-limited environments and support the non-yield outcome of maintenance.

Table 1. Bacterial members used in the synthetic community (SynCom) system.

| Member                   | <i>Burkholderia thailandensis</i> E264 | <i>Chromobacterium violaceum</i> ATCC 31532 | <i>Pseudomonas syringae</i> pv. tomato DC3000 |
|--------------------------|----------------------------------------|---------------------------------------------|-----------------------------------------------|
| Genome size (Mb)         | 6.72                                   | 4.76                                        | 6.54                                          |
| Family                   | <i>Burkholderiaceae</i>                | <i>Neisseriaceae</i>                        | <i>Pseudomonadaceae</i>                       |
| No. of CDSs <sup>a</sup> | 5639                                   | 4393                                        | 5576                                          |
| Chromosomes              | 2                                      | 1                                           | 1                                             |
| Plasmids                 | 0                                      | 0                                           | 2                                             |
| Reference                | Brett et al., 1998                     | Wells et al., 1982                          | Buell et al. 2003                             |

<sup>a</sup>CDSs, Coding sequences.

## Results

## Stationary phase dynamics of microbial communities: transcriptional responses

We had four replicate, independent timeseries of each of seven community arrangements (three monocultures plus four cocultures of every pair and the 3-member arrangement), and here focus on the coculture analyses to gain insights into community outcomes. A range of 518 to 1204 genes were differentially expressed by each member in coculture, irrespective of the identity of neighbors (Fig. S1.1, false discovery rate adjusted p-value (FDR)  $\leq 0.01$ ). In addition, each member also had differential gene expression that was unique to a particular neighbor(s). Summarizing across all coculture arrangements, 2,712/5639 (48.1%), coding sequences (CDSs), 3267/4393 CDSs (74.4%), and 4974/5576 CDSs (89.2%) genes in *B. thailandensis*, *C. violaceum*, and *P. syringae* were differentially expressed, respectively (FDR  $\leq 0.01$ ). Both community membership and time contributed to the transcriptional response of each member (Fig. 1, Table S1.1). Together, these data suggest that there are both general and specific consequences of neighbors for the transcriptional responses of these bacterial community members.

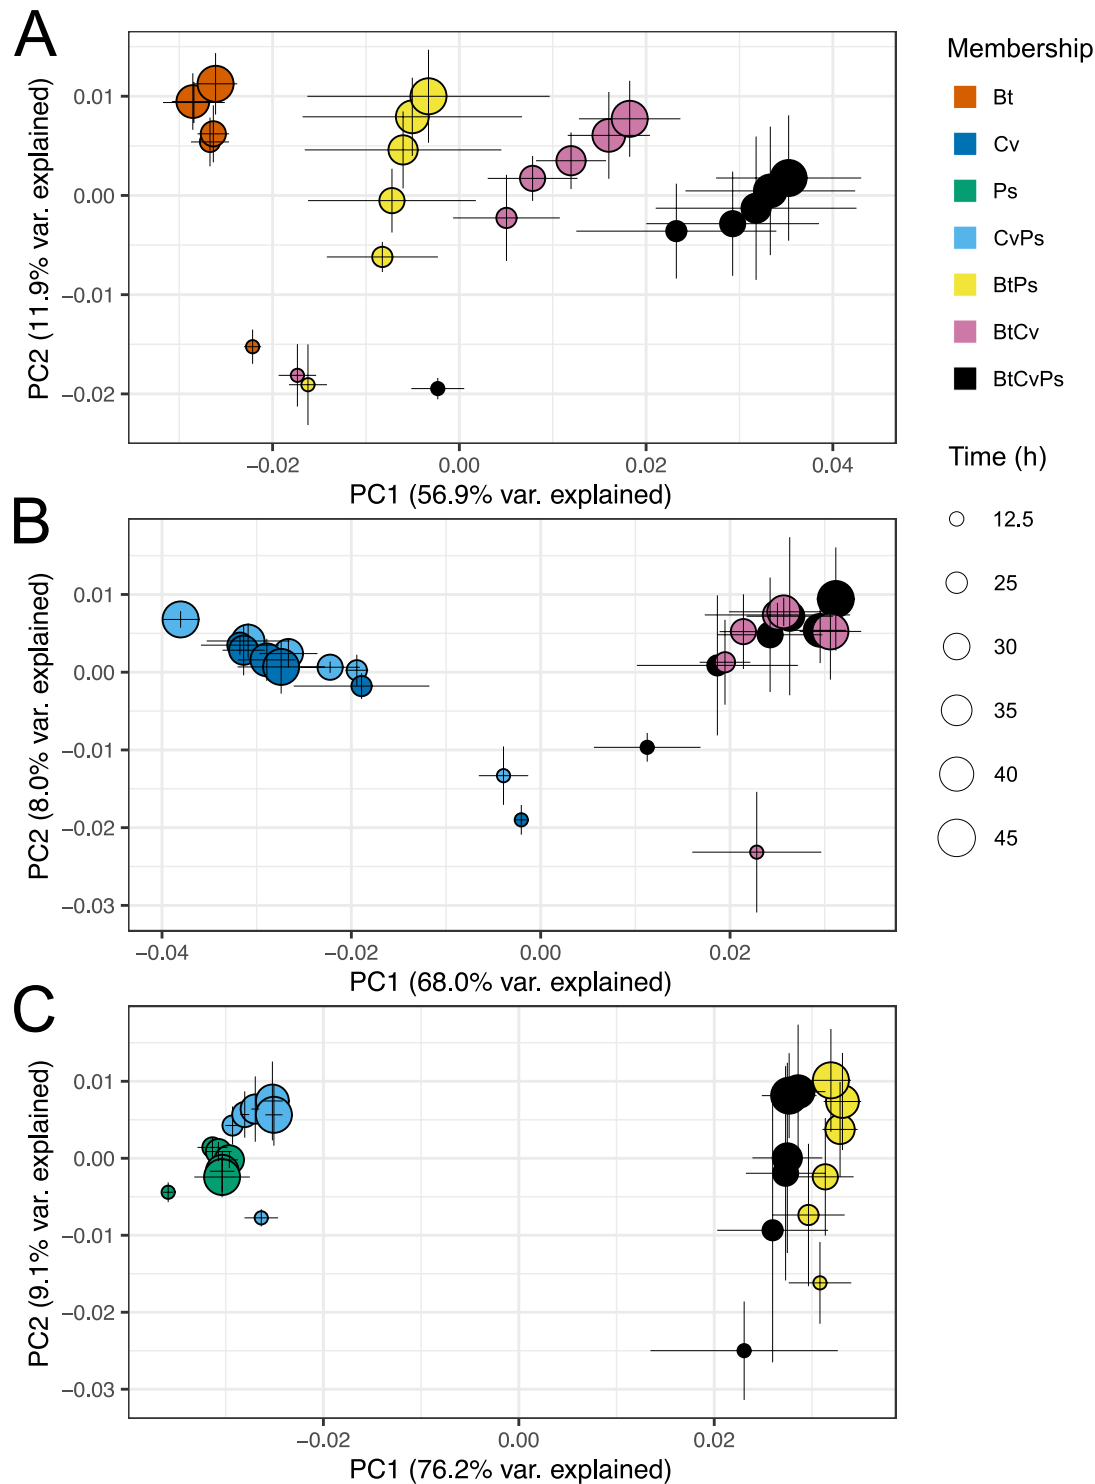

**Figure 1. Transcriptional responses are driven by community membership and time.** Shown are principal coordinates analysis (PCoA) plots for *B. thailandensis* (Bt, A), *C. violaceum* (Cv, B), and *P. syringae* (Ps, C). Each point represents a mean transcript profile for a community member given a particular community arrangement (neighbor(s) included, indicated by symbol color) and sampled at a given time point over exponential and stationary growth phases (in hours since inoculation, h, indicated by symbol size, n=3 to 4 replicates per timepoint/community arrangement). The Bray-Curtis distance



metric was used to calculate dissimilarities between transcript profiles. Error bars are 1 standard deviation around the mean axis scores.

Temporal trajectories in transcript profiles were generally reproducible across replicates for each member given a particular community arrangement (PROTEST analyses, Table S1.2). Each member had a distinct transcript profile ( $0.480 \leq r^2 \leq 0.778$  by Adonis; P value, 0.001; all pairwise false discovery rate [FDR]-adjusted P values,  $\leq 0.068$  except for the *C. violaceum* coculture with *B. thailandensis* vs 3-member comparison, Table S1.3). For all ordinations, community membership had the most explanatory value (Axis 1), followed by time (Axis 2), with the most variation explained by the interaction between time and membership (Table S1.1). Membership alone accounted for 60.6% and 77.0% of the variation explained in *C. violaceum* and *P. syringae* analyses, respectively and 46.3% in the *B. thailandensis* analysis (Table S1.3).

When included in the community, *B. thailandensis* strongly determined the transcript profiles of the other two members. For example, the inclusion of *B. thailandensis* in a coculture differentiated transcript profiles for both *C. violaceum* and *P. syringae* (Fig. 1B & 1C). Thus, *B. thailandensis* appears to have had a dominating influence on the transcriptional response of neighbors, and these responses were dynamic with respect to time.

We analyzed clusters of orthologous groups of proteins (COGs) to infer the responses of members to their neighbors. Differentially expressed genes were categorized as upregulated or downregulated based on temporal patterns and representation in COG groups (Fig. S1.2). We focused on the largest discrepancies

between upregulated and downregulated within COG groups, which provide insights into broad biological processes affected by exometabolite interactions. COG groups trending towards upregulation in *B. thailandensis* included secondary metabolites biosynthesis, transport, and catabolism [Q], signal transduction mechanisms [T], and cell motility [N] while COG categories trending towards downregulation included cell cycle control, cell division, chromosome partitioning [D], translation, ribosomal structure and biogenesis [J], and defense mechanisms [V]. These results suggest that *B. thailandensis* responds to neighbors via downregulation of growth and reproduction and upregulation of secondary metabolism. We therefore hypothesized that *B. thailandensis* was producing bioactive exometabolites against *C. violaceum* and *P. syringae* to competitively inhibit their growth.

Because of the strong transcript response of *C. violaceum* and *P. syringae* when neighbored with *B. thailandensis* (Fig. 1B & 1C), we first focused on COG group trends within community arrangements with *B. thailandensis* (Fig. S1.2B & S1.2C, rows 2 & 3). COG groups tending towards upregulation in *C. violaceum* and *P. syringae* were translation, ribosomal structure and biogenesis [J] and replication, recombination, and repair [L], respectively. COG groups tending towards downregulation in *C. violaceum* and *P. syringae* were signal transduction mechanisms [T] and secondary metabolites biosynthesis, transport, and catabolism [Q], respectively. These results suggest that the presence of *B. thailandensis* alters its neighbor's ability to respond to the environment and inhibits secondary metabolism.

We were interested in understanding patterns of differential gene regulation and how individual genes contribute to the observed dynamics in Figure 1. The top ~500

differentially expressed genes (see methods: *Circos plots*) were visualized by genomic location and temporal dynamics (Figs. S1.3-S1.5). These results show that the gene dynamics for *C. violaceum* and *P. syringae* when grown in the 3-member community are consistent with each neighbor's gene dynamics when grown only with *B. thailandensis* (Figs. S1.4 & S1.5, heatmap, outer two tracks vs. inner two tracks). Interestingly, 68.4% (340 genes) of the top differentially regulated genes in *B. thailandensis* were located on chromosome II despite chromosome II only accounting for 44.0% of all coding sequences (2365 coding sequences). In addition, nearly all *P. syringae* plasmid genes were upregulated when *P. syringae* was neighbored with *B. thailandensis*. These plasmids were significantly enriched for processes related to DNA recombination, recombinase activity, and DNA binding/integration (GO enrichment, Table S1.4).

#### Stationary phase dynamics of microbial communities: exometabolomic responses

Because member populations are physically separated in the SynCom transwell system but allowed to interact chemically, observed transcript responses in different community arrangements are inferred to result from exometabolite interactions. Spent medium from the shared medium reservoir was collected from each transwell plate and analyzed using mass spectrometry to detect exometabolites. We focused our analysis on those exometabolites that had maximum accumulation in a coculture community arrangement (either in pairs or in 3-member community). Consistent with the transcript analysis, we found that both community membership and time explained the

216 exometabolite dynamics, and that the explanatory value of membership and time was  
217 maintained across all polarities and ionization modes (Fig. 2, Table S2.1).

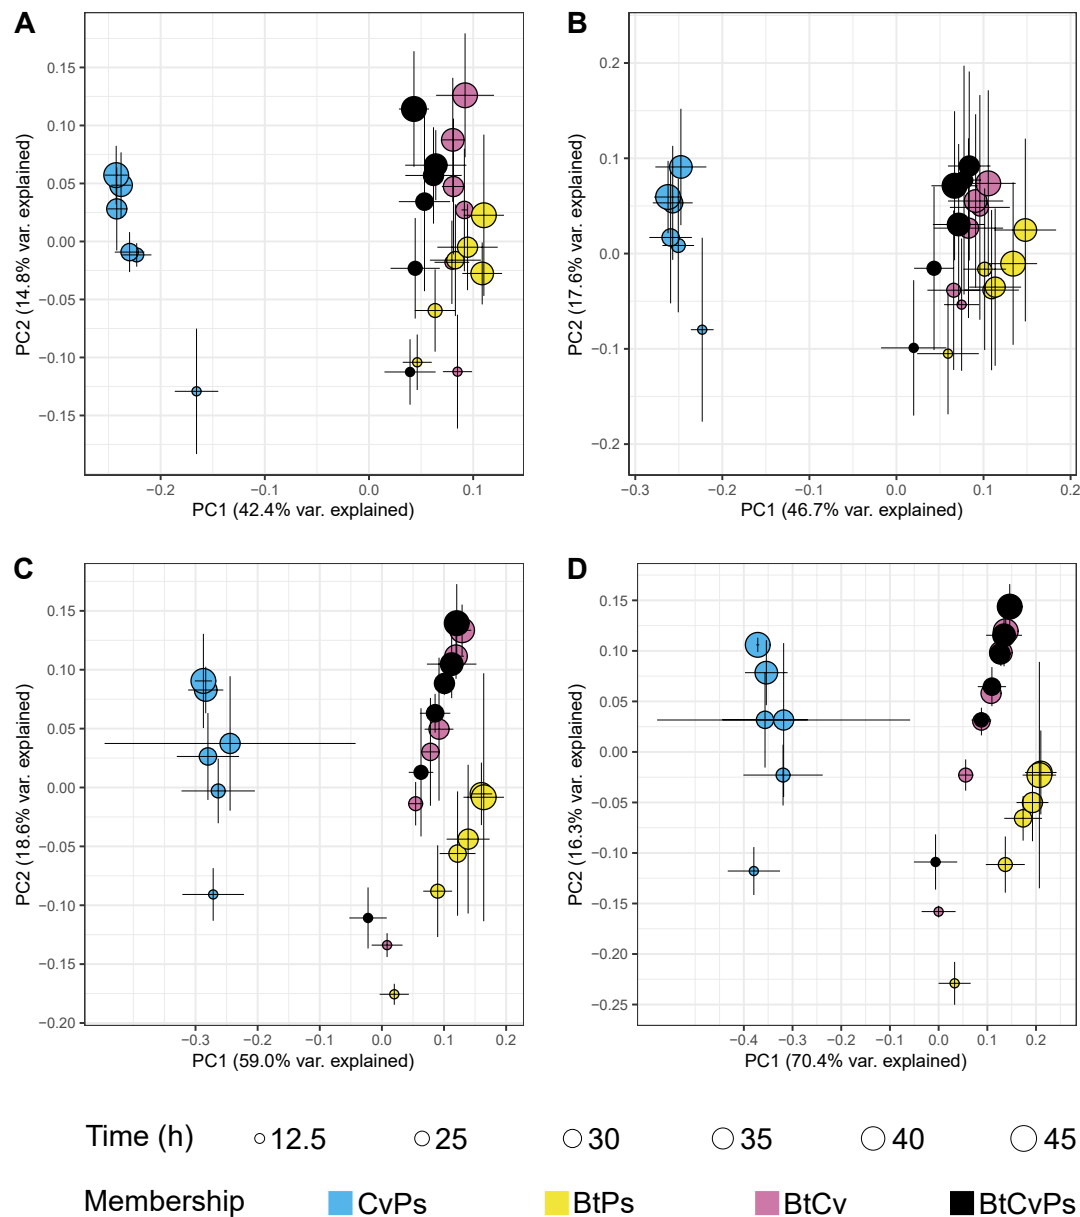

219 **Figure 2. Bacterial community exometabolite profiles differ by community membership and time.**  
220 Shown are PCoA plots for exometabolite profiles from the following mass spectrometry modes: polar  
221 positive (A), polar negative (B), nonpolar positive (C), and nonpolar negative (D). Each point represents  
222 the mean exometabolite profile (relative contributions by peak area) given a particular community  
223 membership (indicated by symbol color) at a particular time point (indicated by symbol shape). The Bray-  
224 Curtis distance metric was used to calculate dissimilarities between exometabolite profiles. Error bars are

1 standard deviation around the mean axis scores (n= 2 to 4 replicates). Bt is *B. thailandensis*, Cv is *C. violaceum*, and Ps is *P. syringae*.

Temporal trajectories in exometabolite profiles were generally reproducible across replicates with some exceptions (PROTEST analyses, Table S2.2, Supplementary File 2.1). Exometabolite profiles were distinct by community membership ( $0.475 \leq r^2 \leq 0.662$  by Adonis; P value, 0.001; all pairwise false discovery rate [FDR]-adjusted P values,  $\leq 0.025$ , Table S2.3), and also dynamic over time. As observed for the member transcript profiles, and the interaction between membership and time had the highest explanatory value for the exometabolite data (Table S2.1).

We found that the *C. violaceum*-*P. syringae* coculture exometabolite profiles were consistently the most distinct from the other coculture memberships (Fig. 2), supporting, again, that the inclusion of *B. thailandensis* was a major driver of exometabolite dynamics, possibly because it provided the largest or most distinctive contributions to the community exometabolite pool. Indeed, we observed that a majority of the most abundant exometabolites were either detected uniquely in the *B. thailandensis* monoculture or accumulated substantially in its included community arrangements (Fig. S2.1). Some exometabolites detected in *B. thailandensis*-inclusive communities were not detected in its monocultures (Fig. S2.1D), suggesting that the inclusion of neighbors contributed to the accumulation of these particular exometabolites (e.g. upregulation of biosynthetic gene clusters or lysis products). *C. violaceum* and *P. syringae* contributed less to the 3-member community exometabolite profile, as exometabolites detected in the *C. violaceum*-*P. syringae* coculture arrangement were less abundant and had lower accumulation over time in the 3-

member community arrangement (Fig. S2.1A). Together, these results suggest that *B. thailandensis* can suppress or overwhelm expected outputs from neighbors.

In summary, we observed both increased accumulation and unique production of exometabolites in pairwise cocultures and in the 3-member community arrangements, with *B. thailandensis* contributing the most to the shared exometabolite pool as determined by comparisons with its monoculture exometabolite profile. Related, the transcriptional responses of *C. violaceum* and *P. syringae* in the 3-member community arrangement is most similar to their respective transcriptional response when neighbored with *B. thailandensis* alone, despite the presence of the third neighbor.

#### *B. thailandensis* increases competition strategies in the presence of neighbors

We observed relatively unchanged viability in *B. thailandensis* (Fig. S3.1). On the contrary, we observed a slight reduction (~2.1 log<sub>2</sub> fold change) in *C. violaceum* live cell counts, and a drastic reduction (~4.7 log<sub>2</sub> fold change) in *P. syringae* live cell counts, when either was cocultured with *B. thailandensis* (Figs. S3.2 & S3.3). Given this reduction in viability and that there have been competitive interactions between *B. thailandensis* and *C. violaceum* previously reported (Chandler et al., 2012), we hypothesized that *B. thailandensis* was using competition strategies to influence its neighbors via production of bioactive exometabolites. If true, we would expect an upregulation in *B. thailandensis* biosynthetic gene clusters (BSGC) that encode bioactive exometabolites. Indeed, we found evidence of this when *B. thailandensis* had neighbors (Fig. 3, Table S3.1).

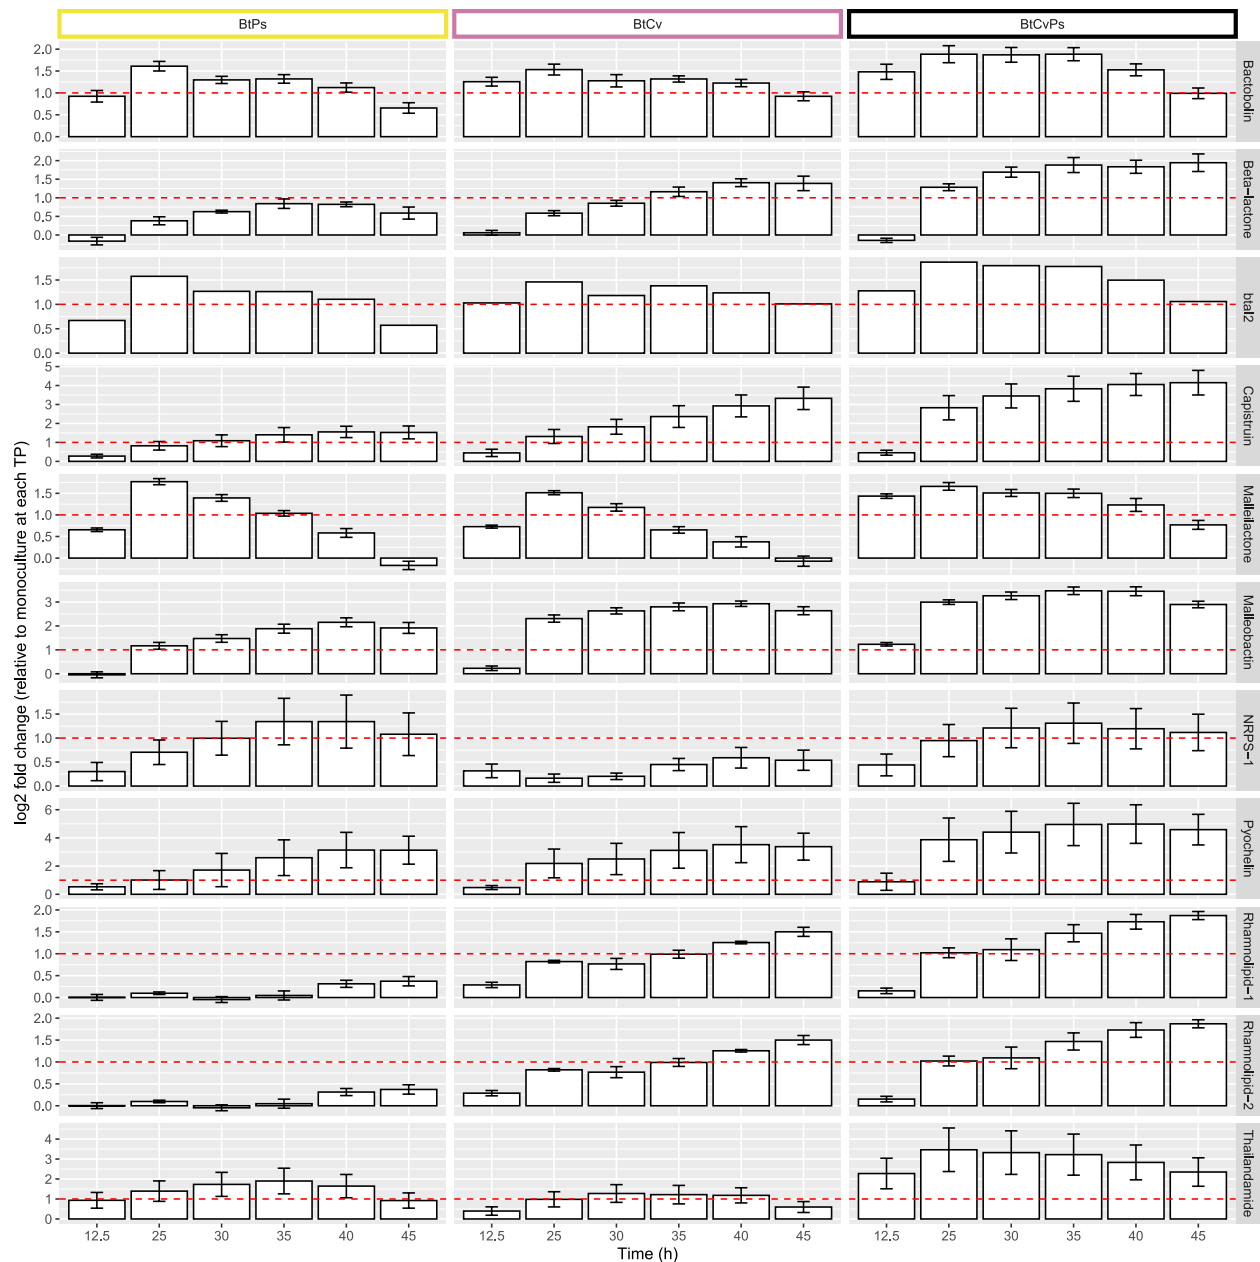

**Figure 3. *B. thailandensis* upregulates biosynthetic gene clusters (BSGC) in cocultures.** Columns represent community membership where Bt: *B. thailandensis*, Cv: *C. violaceum*, and Ps: *P. syringae* and rows represent BSCC in *B. thailandensis*. Genes part of a BSGC were curated from antiSMASH predictions and literature-based evidence. Within each BSGC, log<sub>2</sub> fold-changes (LFC) were calculated by comparing gene counts from a coculture to the monoculture control at each time point. LFC were then averaged from all biosynthetic genes in the BSGC at each time point. We defined an upregulated BSGC as a BSGC that had at least two consecutive stationary phase time points with a LFC > 1 (indicated by the horizontal line). Note that plots for each BSGC have separate scales for the Y-axis.

This suggests that *B. thailandensis* responded to neighbors by upregulating genes involved in the production of bioactive compounds, likely to gain a competitive advantage. However, not all BSGCs in *B. thailandensis* were upregulated. Some BSGCs were unaltered or downregulated (Fig. S3.4). *C. violaceum* upregulated only 1 BSGC in coculture with *B. thailandensis*, while *P. syringae* did not upregulate any BSGC in any coculture (Figs. S3.5 & S3.6). Interestingly, coculturing with *C. violaceum* and *P. syringae* resulted in the upregulation of an unidentified beta-lactone and an unidentified non-ribosomal peptide synthetase (NRPS) in *B. thailandensis*, respectively. Similarly, coculturing with *B. thailandensis* resulted in the upregulation on an unidentified NRPS- Type I polyketide synthase in *C. violaceum*. We also note that two additional unidentified NRPS passed the LFC threshold of 1 in *C. violaceum*. However, these were only upregulated at the exponential phase time point and subsequently downregulated or below the LFC threshold in all stationary phase time points. Interspecies interactions led to the upregulation of BSGC in both *B. thailandensis* and *C. violaceum* and three of these BSGC encode potentially novel bioactive exometabolites.

We were able to identify 6 of the 11 products from the upregulated *B. thailandensis* BSGC and quantify their abundances from mass spectrometry data (Fig. S3.7, Table S3.2). For any given identified exometabolite, it differentially accumulated between community arrangements containing *B. thailandensis* (Table S3.3), particularly when comparing the *B. thailandensis* monoculture compared to each coculture arrangement (Table S3.4). As expected, these identified exometabolites were not detected in community arrangements that did not include *B. thailandensis*. Bactobolin



was the only identified exometabolite that accumulated in monoculture to equivalent levels of accumulation in all coculture conditions. Thus, *B. thailandensis* increased competition strategies with neighbors through the upregulation and production of many bioactive exometabolites. Of these bioactive exometabolites, three are documented antimicrobials (Amunts et al., 2015; Kuznedelov et al., 2011; Wozniak et al., 2018), two are siderophores (Biggins et al., 2012; Butt and Thomas, 2017), and one is a biosurfactant (Dubeau et al., 2009). We conclude that *B. thailandensis* produced bioactive exometabolites to competitively interact using both interference and exploitative competition strategies (Ghoul and Mitri, 2016). Given that *B. thailandensis* upregulated competition strategies, and responded more broadly in producing competition-supportive exometabolites when grown with neighbors, we hypothesized that these bioactive exometabolites are responsible for the altered transcriptional responses in *C. violaceum* and *P. syringae*.

### *Interspecies co-transcriptional networks reveal coordinated gene expression related to competition*

We performed interspecies coexpression network analysis to infer interspecies interactions. We used temporal profiles to generate 23 and 24 coexpression networks for *B. thailandensis*-*C. violaceum* and *B. thailandensis*-*P. syringae* cocultures, respectively (Table S4.1). As expected, the majority of nodes network had intraspecies edges only, with interspecies edges comprising 1.85% and 1.90% of the total edges in the *B. thailandensis*-*C. violaceum* and *B. thailandensis*-*P. syringae* networks,

respectively. We explored interspecies edges for evidence of interspecies transcriptional co-regulation.

We performed two analyses (module analysis and GO enrichment) to validate networks and infer interspecies interactions (Fig. S4.1). Module analysis validated networks as intraspecies modules enriched for biological processes (Supplementary File 4.1). To infer interspecies interactions, we filtered genes with interspecies edges and performed enrichment analysis (Supplementary File 4.2). The top enriched Gene Ontology (GO) term for *B. thailandensis* when paired with *C. violaceum* was antibiotic synthesis of thailandamide, supporting interference competition. Though the top enriched GO term in *B. thailandensis* when paired with *P. syringae* was bacterial-type flagellum-dependent cell motility, antibiotic synthesis of malleilactone was also enriched. Both thailandamide genes from the *B. thailandensis*-*C. violaceum* network (Fig. 4) and malleilactone genes from the *B. thailandensis*-*P. syringae* network (Fig. S4.2) formed near-complete modules within their respective BSGCs.

Chodkowski & Shade: Exometabolite-driven maintenance competition in bacteria

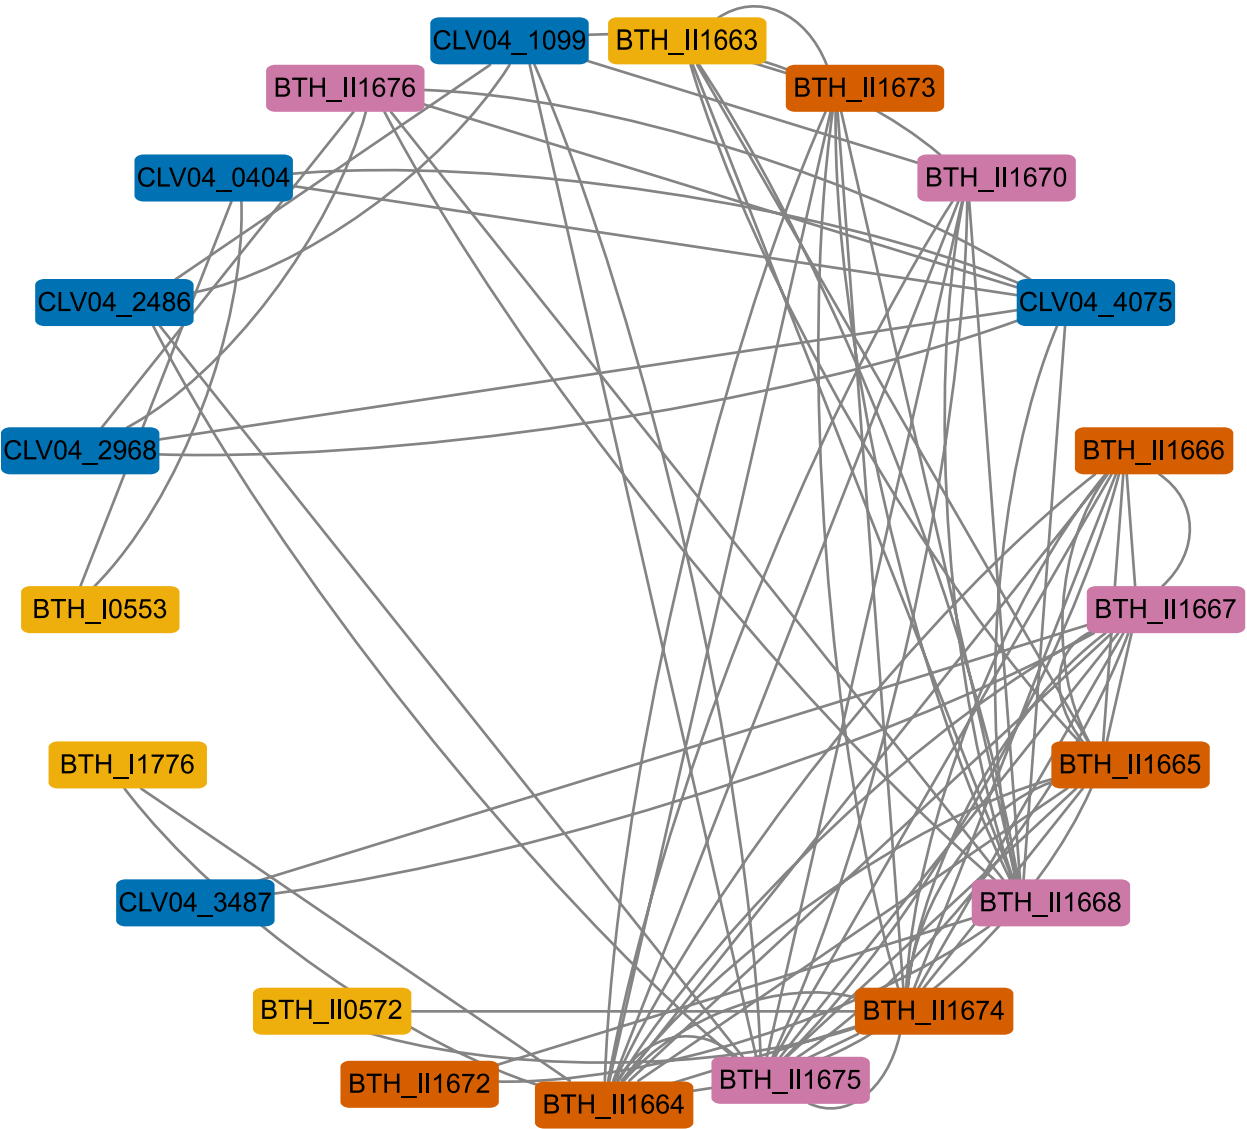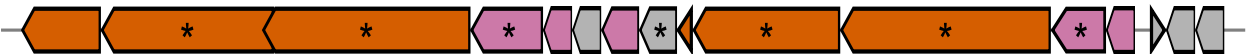

|               | <i>B. thailandensis</i> - <i>C. violaceum</i><br>interspecies network | <i>B. thailandensis</i> - <i>P. syringae</i> interspecies<br>network |
|---------------|-----------------------------------------------------------------------|----------------------------------------------------------------------|
| Bactobolin    | ✓                                                                     | ✓                                                                    |
| Beta-lactone  | ✓                                                                     | x                                                                    |
| Capistruin    | ✓                                                                     | ✓                                                                    |
| Malleilactone | ✓                                                                     | ✓                                                                    |
| Malleobactin  | ✓                                                                     | ✓                                                                    |
| NRPS-1        | x                                                                     | ✓                                                                    |
| Pyochelin     | ✓                                                                     | ✓                                                                    |
| Rhamnolipid   | x                                                                     | x                                                                    |
| Thailandamide | ✓                                                                     | ✓                                                                    |

**Figure 4. *B. thailandensis* genes involved in thailandamide production are detected as interspecies edges in the *B. thailandensis*-*C. violaceum* coexpression network and biosynthetic genes organize into network modules.** A network module containing the thailandamide BSGC is shown. The network module nodes are color coded by *B. thailandensis* gene type (BSGC or not) and type of connections (interspecies or not): thailandamide biosynthetic genes that had interspecies edges (magenta), thailandamide biosynthetic genes that did not have interspecies edges (orange), or other genes that were not part of the BSGC (yellow); as well as genes that were from *C. violaceum* (blue). The chromosomal organization of the thailandamide BSGC is shown below the network module. The same colors are applied to the BSGC operon. The operons also depict genes that were not detected within the interspecies network, shown in gray. Asterisks indicate core biosynthetic genes in the BSGCs, as predicted from antiSMASH. The table shows upregulated *B. thailandensis* BSGCs (Fig. 3) and whether there were interspecies edges detected (check is yes, x is no).

At least one gene from each of *B. thailandensis*'s upregulated BSGCs (Fig. 3, Table) had an interspecies edge, except for rhamnolipid. The top GO term for both *C. violaceum* and *P. syringae* genes that had edges shared *B. thailandensis* was bacterial-type flagellum-dependent motility. Other notable enriched GO processes were efflux activity for *C. violaceum* and signal transduction for *P. syringae*. Specifically, a DNA starvation/stationary phase gene (CLV04\_2968, Fig. 4), *dspA*, was connected within the thailandamide module of the *B. thailandensis*-*C. violaceum* network and a TonB-dependent siderophore receptor gene (PSPTO\_1206, Fig. S4.2) was connected within the malleilactone module of the *B. thailandensis*-*P. syringae* network (Supplementary File 4.3). Interestingly, both CLV04\_2968 and PSPTO\_1206 were differentially downregulated when cocultured with *B. thailandensis* (Figs. S4.3A & S4.4A, respectively). Additionally, the closest homolog for *dspA* in *B. thailandensis* was unaltered (BTH\_I1284, Supplementary File 4.4) when cocultured with *C. violaceum* (Fig. S4.3B) and the closest homolog to the TonB-dependent receptor in *B. thailandensis* (BTH\_I2415, Supplementary File 4.5) was differentially upregulated when cocultured with *P. syringae* (Fig. S4.4B). Taken together, these interspecies networks revealed that *B. thailandensis* BSGC have coordinated expression patterns to biological process in

both *C. violaceum* and *P. syringae*, suggesting that bioactive exometabolites were driving their transcriptional responses.

### *Distinctive member responses when assembled together*

Within a complex community, there can be outcomes that are not expected based on interactions that are observed in simpler situations of member pairs (Sanchez-Gorostiaga et al., 2019; Mickalide et al., 2019; D'hoel et al., 2018). A typical predictive approach uses the additivity assumption, where the null expectation is that a members' outcome in more complex communities is a summation of its outcomes in simpler communities (Momeni et al., 2017). Patterns that deviate from the assumption arise from biological phenomena that are deemed non-additive. Much emphasis has been placed on predictions on the additive (or non-additive deviation) nature of growth outcomes in more complex environments (Foster and Bell, 2012; Pacheco et al., 2021; Estrela et al., 2021). Here, we evaluated non-additive responses (e.g. transcriptomics) and behaviors (e.g. exometabolite production). We identified genes with non-additive upregulation in the 3-member community (Fig. S5.1, Supplementary File 5.1, see methods: *Non-additive gene expression*). For *B. thailandensis*, most of these genes consistently had nonadditive upregulation throughout stationary phase. Both *P. syringae* and *C. violaceum* trended towards transient dynamics of non-additive upregulation, which tended to occur at a specific timepoint. For each member, there was a stark contrast in genes with non-additivity between the exponential phase timepoint and all stationary phase time points. Notably, the top GO enrichments included antibiotic biosynthesis for *B. thailandensis* and structural constituents of the ribosome for both *C.*

395 *violaceum* and *P. syringae* (Supplementary File 5.2). Of the BSGC in *B. thailandensis*,  
 396 multiple genes involved in the production of thailandamide, pyochelin, capistrin, and  
 397 malleobactin had non-additive upregulation. Since we were able to identify some of  
 398 these compounds as features within the mass spectral data, we asked if non-additive  
 399 transcriptional activity corresponded to non-additive exometabolite production.

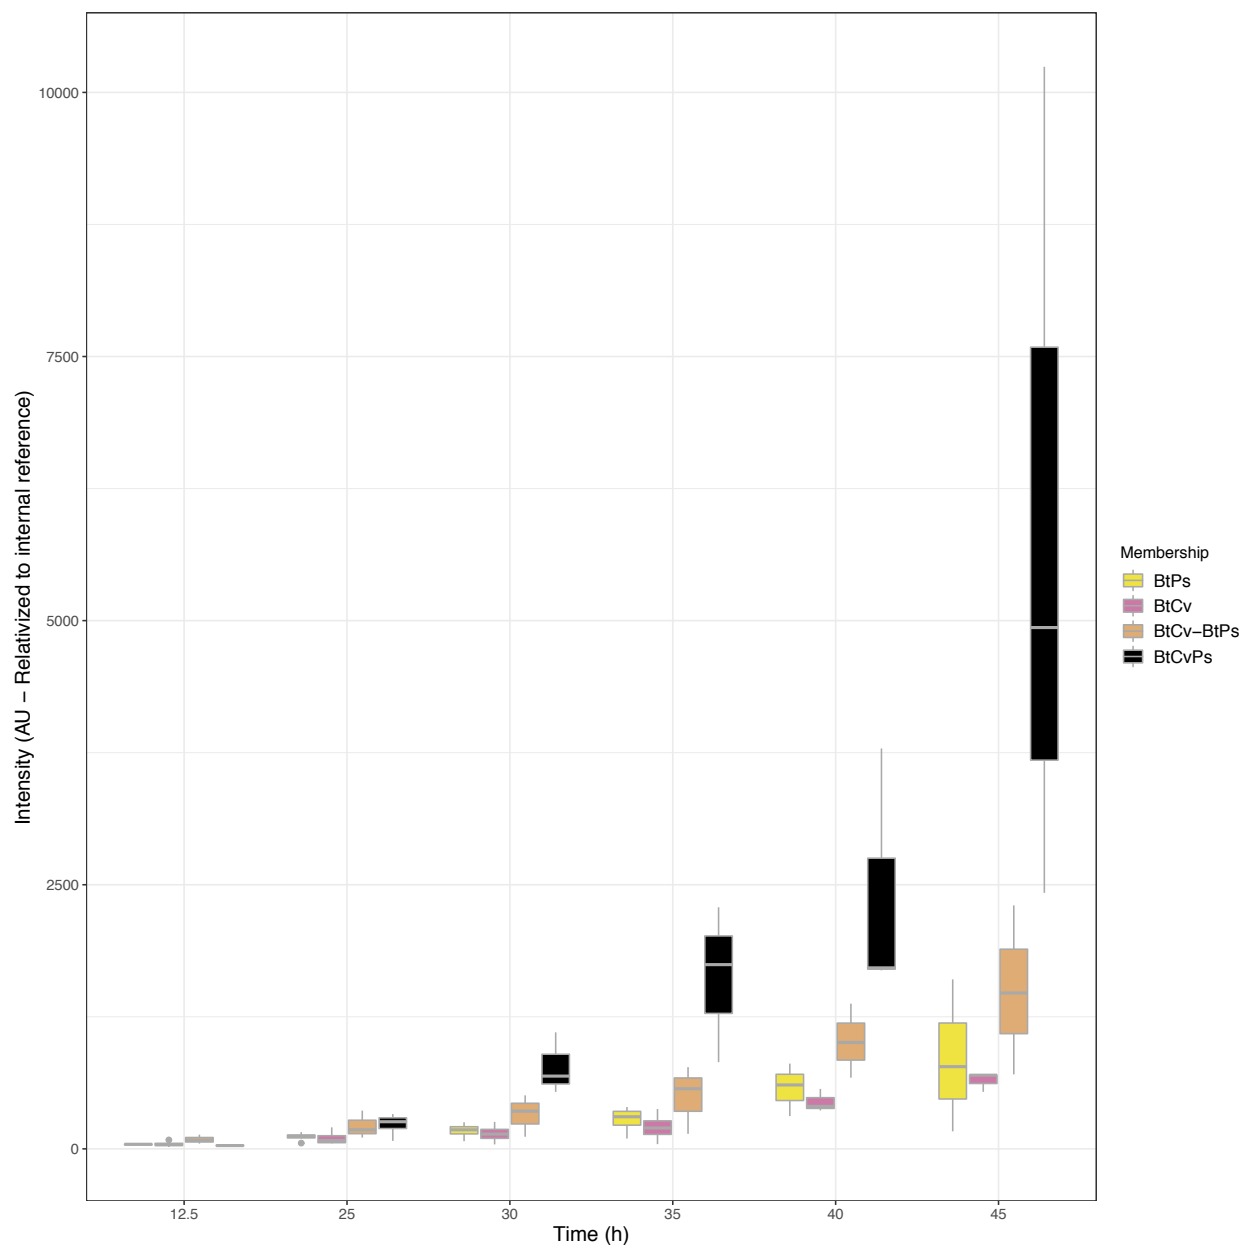

400

**Figure 5. Thailandamide accumulates in a non-additive manner.** The accumulation of thailandamide was quantified through time ( $n = 3-4$  integrated peak areas per time point). The bottom and top of the box are the first and third quartiles, respectively, and the line inside the box is the median. The whiskers extend from their respective hinges to the largest value (top), and smallest value (bottom) was no further away than  $1.5 \times$  the interquartile range. Colors correspond to the community membership for the *B.thailandensis*-*P. syringae* coculture (yellow, BtPs), the *B. thailandensis*-*C. violaceum* coculture (magenta, BtCv), the “expected” exometabolite abundance in the 3-member community obtained from additive peak areas from the *B.thailandensis*-*P. syringae* and *B.thailandensis*-*C. violaceum* cocultures (orange, BtCv+BtPs), and the 3-member community (black, BtCvPs).

Most exometabolite features did not exceed expectations of additivity, as the average fold change across all time points was  $\sim 0.6$  (Fig. S5.2). However, we did find that 858 exometabolomic features accumulated in the 3-member community in a non-additive manner (Fig. S5.3), including thailandamide (Fig. 5) and pyochelin (Fig. S5.4), but not capistrin (Fig. S5.5). At the final stationary phase time point (45 h), thailandamide accumulated  $\sim 4$ -fold more and pyochelin accumulated  $\sim 3$ -fold more than the additive expectation. Thailandamide and pyochelin were consistently above  $1\sigma$  of the average additive fold change for all coculture filtered exometabolites throughout stationary phase (Fig. S5.2, ablines). We combined peak areas from pairwise cocultures to create an “expected” exometabolite abundance over the time course for thailandamide, pyochelin, and capistrin (Figs. 5, S5.4, S5.5, orange). The experimental exometabolite abundance over the time course was significantly different from the “expected” exometabolite abundance for thailandamide, but not for pyochelin and capistrin (repeated measures ANOVA, Table S5.1). When comparing each time point separately for thailandamide, significance was obtained only for the initial time point, and later time points were trending toward significance (Table S5.2).

## Discussion

Here, we used a synthetic community system to understand how exometabolomic interactions determine members responses and behaviors. Our experiment used a bottom-up approach to compare the seven possible community arrangements of three members, and their dynamics in member transcripts and community exometabolites over stationary phase. Differential gene expression across community arrangements and over time show that the exometabolites released by a member were sensed and responded to by its neighbors. Furthermore, members' behaviors in monocultures changed because of coculturing, as evidenced by differential exometabolite production. *B. thailandensis* evoked the largest transcriptional changes in *C. violaceum* and *P. syringae*, and these changes were driven largely by several increases in *B. thailandensis* competitive strategies. Numerous transcripts and exometabolite were non-additive in the 3-member community, suggesting that predictions of members outcomes in more complex communities will not always be a simple summation of pairwise outcomes. That interactions within a relatively simple community altered the behavior of each member is important because these kinds of behavioral changes could, in turn, drive changes in community structure and/or function in an environmental setting. For example, it was shown that interspecies interactions more strongly influenced the assembly of *C. elegans* gut communities than host-associated factors (Ortiz et al., 2021). Therefore, mechanistic and ecological characterization of interspecies interactions will inform as to the principles that govern emergent properties of microbial communities.



Overall, competitive interactions predominated in this synthetic community. Our previous study found that, over stationary phase in monocultures, each member released and accumulated at least one exometabolite documented to be involved in either interference or exploitative competition (Chodkowski and Shade, 2020). This suggests that entry into stationary phase primed members for competitive interactions, whether there were heterospecific neighbors present. We interpret this strategy of preemptive aggression to be especially advantageous to *B. thailandensis*, as it successfully used competitive strategies against both *C. violaceum* and *P. syringae*. *B. thailandensis*'s success was supported by decreased viable *P. syringae* cells when cocultured with *B. thailandensis*. Though *C. violaceum* viable cell counts were not as affected directly by the coculture with *B. thailandensis*, *B. thailandensis*-produced bactobolin (Duerkop et al., 2009) was detected in the shared medium reservoir. Bactobolin is a bacteriostatic antibiotic previously shown to be bioactive against *C. violaceum* (Chandler et al., 2012). But, *C. violaceum* can resist bactobolin through upregulation of an RND-type efflux pump (Evans et al., 2018). This finding also is supported by our data, as all genes coding for the CdeAB-OprM RND-type efflux system and the TetR-family transcriptional regulator were upregulated in *C. violaceum* cocultures with *B. thailandensis* (CLV04\_2412-CLV04\_2415).

Coculturing can induce secondary metabolism (Pettit, 2009; Netzker et al., 2015; Zhu et al., 2014) because an exometabolite produced by one microbe can prompt secondary metabolism in a neighbor (Okada and Seyedsayamdost, 2017). We found that coculturing led to the upregulation of numerous BSGCs in *B. thailandensis*. These exometabolites included bactobolin, malleilactone (Biggins et al., 2012; Truong et al.,

2015; siderophore and cytotoxin), malleobactin (Alice et al., 2006; Gupta et al., 2017; siderophore), capistruin (Knappe et al., 2008; lasso peptide), thailandamide (Ishida et al., 2010; polyketide), pyochelin (Butt and Thomas, 2017; siderophore), rhamnolipids (Dubeau et al., 2009; biosurfactants), and two uncharacterized BSGCs encoding nonribosomal peptide synthetases. Of these exometabolites, bactobolin, capistruin, and thailandamide have documented antimicrobial activities through translation inhibition (Amunts et al., 2015), transcription inhibition (Kuznedelov et al., 2011), and inhibition of fatty acid synthesis (Wozniak et al., 2018), respectively. For those exometabolites we were able to identify with mass spectrometry, their accumulation in cocultures was correlated with the upregulation of their BSGCs. Furthermore, up/downregulated patterns across all *B. thailandensis* BSGCs is consistent with ScmR global regulatory patterns of secondary metabolism (Mao et al., 2017). Though we were not able to pinpoint the exact inducers of BSGCs, exometabolites such as antibiotics (Okada et al., 2016) and primary metabolites (Li et al., 2020) have been documented to induce secondary metabolism in *B. thailandensis*. *C. violaceum* can inhibit *B. thailandensis* (Chandler et al., 2012) but we did not observe *B. thailandensis* inhibition based on cell counts. However, we did find that in stationary phase *C. violaceum*-*B. thailandensis* cocultures, *C. violaceum* upregulated an uncharacterized hybrid nonribosomal peptide synthetase-type I polyketide synthase. *P. syringae* was the least competitive of the three neighbors, as evidenced by a reduction in live cell counts when cocultured with *B. thailandensis*. Also, *P. syringae* did not increase competitive strategies when cocultured, as no BSGCs were consistently upregulated across all coculture conditions. In summary, though all three neighbors used competitive strategies, *B. thailandensis*

was most successful and displayed continued aggression in cocultures over stationary phase through increased production of exometabolites involved in interference and exploitative competition strategies.

Given the upregulation of BSGCs in *B. thailandensis* and the strong transcriptional responses of *C. violaceum* and *P. syringae* to the presence of *B. thailandensis*, we hypothesized that competitive exometabolites were contributing to their community dynamics. Thus, we used a coexpression network analysis with our longitudinal transcriptome series to infer interspecies interactions (McClure, 2019). This use of this approach was first demonstrated to infer coregulation between a phototroph-heterotroph commensal pair (McClure et al., 2018). Our network confirmed that *B. thailandensis* BSGCs had coordinated gene expression patterns with both *C. violaceum* and *P. syringae*. Interspecies nodes in both networks contained various genes involved in the aforementioned upregulated *B. thailandensis* BSGCs. In particular, we focused on interspecies edges within thailandamide nodes for the *B. thailandensis*-*C. violaceum* network and interspecies edges within malleilactone nodes for the *B. thailandensis*-*P. syringae* network because these were significantly enriched as interspecies nodes. A *C. violaceum* gene of interest, CLV04\_2968, was contained within the thailandamide cluster of interspecies nodes. This gene codes for a DNA starvation/stationary phase protection protein and had the highest homology to the Dps protein in *Escherichia coli* across all *C. violaceum* protein coding genes. Dps mediates tolerance to multiple stressors and *dps* knockouts are more susceptible to thermal, oxidative, antibiotic, iron toxicity, osmotic, and starvation stressors (Karas et al., 2015). Interestingly, CLV04\_2968 was downregulated when cocultured with *B. thailandensis*, suggesting

that *B. thailandensis* attenuates *C. violaceum* stress tolerance over stationary phase.

While we observed a slight decrease in viable *C. violaceum* cells when cocultured with *B. thailandensis*, one may expect *C. violaceum* to have increased sensitivity to a subsequent stress (e.g. pH stress; Nair and Finkel, 2004) resulting from CLV04\_2968 downregulation in the presence of *B. thailandensis*.

In the *B. thailandensis*-*P. syringae* coexpression network, a *P. syringae* gene of interest, PSPTO\_1206, was contained within the malleilactone cluster of interspecies nodes. PSPTO\_1206 is annotated as a TonB-dependent siderophore receptor. A *P. syringae* iron-acquisition receptor had coordinated expression with a malleilactone, which has been characterized as a siderophore with antimicrobial properties (Biggins et al., 2012). Interestingly, this gene was downregulated when in coculture with *B. thailandensis*. In contrast, the closest TonB-dependent siderophore receptor homolog to PSPTO\_1206 in *B. thailandensis*, BTH\_I2415, was upregulated in coculture conditions with *P. syringae*. To summarize, coexpression network analysis reveal coordinated gene expression patterns that helped to infer that BSGC upregulation likely explains the influence of *B. thailandensis* on both *C. violaceum* and *P. syringae*. *B. thailandensis*-increased competition strategies were coordinated with a potential decrease in competition strategies in *C. violaceum* via reduced stress tolerance and in *P. syringae* with reduced iron acquisition ability.

A major goal in microbial ecology is to predict community dynamics for purposes of modulating and/or maintaining ecosystem function (Antwis et al., 2017, Konopka, 2009). At its core, microbial functional properties emerge, in part, from the concerted interactions of multi-species assemblages. Predictions can be complicated by non-

543 additive phenomena that arise in more complex communities. For example, non-  
544 additive phenomena have been documented in gene expression (Cornforth et al., 2014;  
545 Bundy et al., 2002), growth (Pacheco et al., 2021), and fitness (Morin et al., 2018).  
546 Here, we also have documented non-additive responses and behaviors in our system  
547 when combinatorial stimuli were present in the 3-member community. *B. thailandensis*  
548 BSGCs displayed non-additive phenomena, as we are able show that the transcriptional  
549 response of certain BSGCs in the 3-member community was greater than the naive  
550 summation of transcriptional response in pairwise arrangements. Furthermore, non-  
551 additive transcriptional responses resulted in non-additive exometabolite accumulation  
552 (e.g. thailandamide & pyochelin) with exceptions (e.g. capistrin). However, we only  
553 quantified exometabolite accumulation in the shared medium reservoir. Differential  
554 release and uptake of bioactive molecules within the community can complicate tracking  
555 metabolite dynamics in the system. Thus, analyses that incorporate both intracellular  
556 and extracellular metabolomics can provide a more complete understanding of altered  
557 microbial metabolism under different conditions. Regardless, we documented non-  
558 additive accumulation of secondary metabolites involved in both competition strategies.  
559 This finding may have implications for high-order interactions, meaning, the nature of  
560 the interaction between two members may be altered by the addition of a third member  
561 (Billick and Case, 1994). For example, one member could produce sublethal antibiotics  
562 in the presence of an antibiotic-sensitive member. The addition of a third member could  
563 stimulate the antibiotic producer to increase antibiotic production, altering the nature of  
564 the initial interaction from sublethal to lethal for antibiotic-sensitive member (Bernier et  
565 al., 2013). In other words, the nature of interactions may be altered depending on

surrounding stimuli that can exacerbate bacterial behaviors not expected by studying the system as simpler parts (Mickalide et al., 2019). Therefore, characterizing transcriptome and metabolome dynamics in microbial communities is expected to inform how non-additive phenomena arise and how they contribute to deviations in predictive models of community outcomes.

Our results indicated that each member continued to maintain competitive strategies despite stagnant population growth. In particular, *B. thailandensis* upregulated various bioactive exometabolites involved in both interference and exploitative competition when with neighbors. An effective competitor is often defined as by its ability to outcompete neighbors via growth advantage that stems from efficient nutrient uptake and/or biomass conversion rates (Miller et al., 2005; De Jong et al., 2017). We add to this that a competitor can also have a fitness advantage through effective maintenance, which can similarly employ interference or exploitative competitive strategies despite no net growth. Maintenance may ensure survival in some environments that impose a stationary phase lifestyle, where long periods of nutrient depletion are punctuated with short periods of nutrient flux. In these scenarios, it warrants to understand how competitive strategies are deployed in the interim of growth and the extent to which these interactions contribute to long-term community outcomes. Though population levels remain constant, sub-populations of growing cells have been observed in stationary phase (Jöers et al., 2020), and continued production of competitive exometabolites may serve as an advantageous strategy to hinder growth of competitors. In addition, some antibiotics remain effective in non-replicating bacteria (McCall et al., 2019). The ability for continued maintenance via effective competition

strategies during stationary phase may provide spatiotemporal maintenance of population levels before growth resumption (Chesson, 1983). Thus, we expect that insights into the long-term consequences of competition for microbial community outcomes will be gained by considering competition in both active growth and maintenance scenarios.

## Material and Methods

### **Bacterial strains and culture conditions**

Freezer stocks of *B. thailandensis*, *C. violaceum*, and *P. syringae* were plated on half-concentration Trypticase soy agar (TSA50) at 27°C for at least 24 h. Strains were inoculated in 7 ml of M9–0.2% glucose medium and grown for 16 h at 27°C, 200 rpm. Cultures were then back-diluted into 50 ml M9-0.2% glucose medium such that exponential growth phase was achieved after 10 h of incubation at 27°C, 200 rpm. Strains were back-diluted in 50 ml M9 glucose medium to target ODs (*B. thailandensis* 0.3 OD, *C. violaceum*: 0.035 OD, *P. syringae* 0.035 OD) such that stationary phase growth would be achieved by all members within a 2 h time frame after 24 h incubation in the transwell plate. The glucose concentration in the final back-dilution varied upon community arrangement- 0.067% for monocultures, 0.13% for pairwise cocultures, and 0.2% for the 3-member community. For each strain, 48 ml of back-diluted culture was transferred as 4 mL aliquots in 12, 5 mL Falcon tubes prior to transferring them into the transwell plate.



## Synthetic community experiments

Transwell plate preparation was performed as previously described (Chodkowski and Shade, 2017). Briefly, we used sterile filter plates with 0.22- $\mu$ m-pore polyvinylidene difluoride (PVDF) filter bottoms (Millipore MAGVS2210). Prior to use, filter plates were washed three times with sterile water using a vacuum apparatus (NucleoVac 96 vacuum manifold; Clontech Laboratories). The filter of well H12 was removed with a sterile pipette tip and tweezer, and 31 ml of M9 glucose medium was added to the reservoir through well H12. The glucose concentration in the reservoir varied upon community arrangement- 0.067% for monocultures, 0.13% for pairwise cocultures, and 0.2% for the 3-member community. Each well was then filled with 130  $\mu$ L of culture or medium. For each plate, a custom R script (RandomArray.R [see script at [https://github.com/ShadeLab/PAPER\\_Chodkowski\\_mSystems\\_2017/blob/master/R\\_analysis/RandomArray.R](https://github.com/ShadeLab/PAPER_Chodkowski_mSystems_2017/blob/master/R_analysis/RandomArray.R)]) was used to randomize community member placement in the wells so that each member occupied a total of 31 wells per plate. In total, there were 7 community conditions- 3 monocultures, 3 pairwise cocultures, and the 3-member community. A time course was performed for each replicate. The time course included an exponential phase time point (12.5 h) and 5 time points assessed every 5 h over stationary phase (25 h – 45 h). Four biological replicates were performed for each community condition for a total of 28 experiments. For each experiment, 6 replicate filter plates were prepared for destructive sampling for a total of 168 transwell plates.



Filter plates were incubated at 27°C with gentle shaking (~0.32 rcf). For each plate, a custom R script (RandomArray.R [see script at [https://github.com/ShadeLab/PAPER\\_Chodkowski\\_mSystems\\_2017/blob/master/R\\_analysis/RandomArray.R](https://github.com/ShadeLab/PAPER_Chodkowski_mSystems_2017/blob/master/R_analysis/RandomArray.R)]) was used to randomize wells for each organism assigned to RNA extraction (16 wells) and flow cytometry (5 wells). The following procedure was performed for each organism when a transwell plate was destructively sampled: i) wells containing spent culture assigned to RNA extraction were pooled into a 1.5 mL microcentrifuge tube and flash frozen in liquid nitrogen and stored at -80 until further processing. ii) 20 µL from wells assigned for flow cytometry were diluted into 180 µL Tris-buffered saline (TBS; 20 mM Tris, 0.8% NaCl [pH 7.4]). In plate arrangements where *P. syringae* was arrayed with *B. thailandensis*, *P. syringae* had a final dilution of 70-fold in TBS. In plate arrangements where *P. syringae* was arrayed in monoculture or in coculture with *C. violaceum*, *P. syringae* had a final dilution of 900-fold in TBS. Final dilutions for *B. thailandensis* and *C. violaceum* were 1,300-fold and 1,540-fold, respectively. iii) Spent medium (~31 mL) from the shared reservoir was transferred to 50 mL conical tubes, flash-frozen in liquid nitrogen and stored at -80 °C prior to metabolite extraction.

## Flow cytometry

Diluted cultures were stained with the Thermo Scientific LIVE/DEAD BacLight bacterial viability kit at final concentrations of 1.5 µM Syto9 (live stain) and 2.5 µM propidium iodide (dead stain). Two hundred microliters of stained cultures were

transferred to a 96-well microtiter U-bottom microplate (Thermo Scientific). Twenty microliters of sample were analyzed on a BD Accuri C6 flow cytometer (BD Biosciences) at a fluidics rate of 66 µl/min and a threshold of 500 on an FL2 gate. The instrument contained the following optical filters: FL1-533, 30 nm; FL2-585, 40 nm; and FL3, 670-nm longpass. Data were analyzed using BD Accuri C6 software version 1.0.264.21 (BD Biosciences).

## **RNA-seq**

### *RNA extraction*

RNA was extracted using the E.Z.N.A. Bacterial RNA kit (Omega Bio-tek, Inc.). An in-tube DNase I (Ambion, Inc AM2222, 2U) digestion was performed to remove DNA from RNA samples. RNA samples were purified and concentrated using the Qiagen RNAeasy MinElute Clean up Kit (Qiagen, Inc). Ten random samples were chosen to assess RNA integrity on an Agilent 2100 Bioanalyzer.

### *RNA sample prep, sequencing, QC, read preprocessing, and filtering*

Standard operating protocols were performed at the Department of Energy Joint Genome Institute as previously described (Chodkowski and Shade, 2020).

### *Pseudoalignment and counting*

Reads from each library with pseudoaligned to the transcriptome of each strain with kallisto (Bray et al., 2016). Raw counts from each library were combined into a gene count matrix for each strain. The gene count matrix was used for downstream analyses.

## Transcriptomics

### *Quality filtering and differential gene expression analysis*

Count matrices for each member were quality filtered in two steps: genes containing 0 counts in all samples were removed, and genes with a transcript count of  $\leq 10$  in more than 90% of samples were removed. DESeq2 (Love et al., 2014) was used to extract size factor and dispersion estimates. These estimates were used as external input into ImpulseDE2 for the analysis of differentially regulated genes (Fischer et al., 2018). Case-control (Cocultures-monoculture control) analyses were analyzed to identify both permanent and transient regulated genes at an FDR-corrected threshold of 0.01. For each member, differences in gene regulation between the three coculture conditions was visualized with venn diagrams using the VennDiagram package. The initial differential gene expression analysis compared each coculture to the monoculture control, separately. It was revealed that there was a subset of genes that were only differentially expressed in the 3-member community. These genes were parsed from the dataset and used to perform two additional analyses in ImpulseDE2. Case-control analyses were performed to analyze differential expression between the 3-member community to each of the pairwise cocultures as controls. Functional enrichment analysis was performed on the collection of genes determined to have unique differential expression in the 3-member community using the BiNGO package in Cytoscape (Maere et al., 2005).

### *COG analysis*

Protein fasta files were downloaded from NCBI and uploaded to eggNOG-mapper v2 (<http://eggno-mapper.embl.de/>) to obtain Clusters of Orthologous Groups (COG) categories. Genes corresponding to COGs were categorized as upregulated or downregulated based on their temporal expression patterns and plotted using ggplot2.

### *Principal coordinates analysis and statistics*

We extracted genes that were differentially expressed with an FDR-corrected threshold of  $< 0.01$  and a  $\log_2$  fold-change  $> 1$  or  $< -1$ . A variance-stabilizing transformation was performed on normalized gene matrices using the `rlog` function in DESeq2. A distance matrix based on the Bray-Curtis dissimilarity metric was then calculated on the variance-stabilized gene matrices and principal coordinates analysis was performed using the R package `vegan`. Principal coordinates were plotted using ggplot2. Coordinates of the first two PCoA axes were used to perform Procrustes analysis using the `procrustes` function in `vegan`. Dissimilarity matrices were used to perform PERMANOVA and variation partitioning and using the `adonis` and `varpart` functions in `vegan`, respectively. The `RVAideMemoire` package was used to perform a post-hoc pairwise PERMANOVAs.

### *Circos plots*

A subset of the top ~500 of differentially regulated genes was determined for each member by assessing differential expression in the 3-member community. A  $\log_2$  fold-change (LFC) cutoff of at least  $> 1.5$  or  $< -1.5$  was used to capture both upregulated and downregulated genes. The LFC threshold needed to be met in at least one

timepoint. We then filtered these genes by those that had differential expression with a significance cutoff of  $< 0.01$  (FDR corrected). *P. syringae* genes encoded on plasmids were an exception. We extracted all coding sequence genes from both plasmids because the entirety of each plasmid could be visualized on a Circos plot with high resolution. From these genes of interest, a variance-stabilizing transformation was performed on normalized gene matrices using the rlog function in DESeq2 and Z-scored on a per gene basis. Circular genome plots were generated in Circos version 0.69-5. Pseudo-genes composed of the minimum and maximum Z-scores were added to each of four tracks to make the Z-score color scale comparable across all community arrangements. Functional enrichment analysis was performed on the collection of genes within each *P. syringae* plasmid using the BiNGO package in Cytoscape.

### *Biosynthetic gene cluster (BSGC) analysis*

NCBI accession numbers were uploaded to antiSMASH 6 beta bacterial version (Blin et al., 2021) to identify genes involved in BSGCs using default parameters. Where possible, literature-based evidence and BSGCs uploaded to MIBiG (Kautsar et al., 2020) were used to better inform antiSMASH predictions. Log2 fold-changes (LFCs) were calculated for all predicted biosynthetic genes within each predicted cluster by comparing coculture expression to monoculture expression at each time point. Average LFCs were calculated from all predicted biosynthetic genes within a predicted BSGC at each time point. Temporal LFC trends were plotted using ggplot2. An upregulated BSGC was defined as a BSGC that had at least two consecutive time points in stationary phase with a LFC  $> 1$ .

## Network analysis

Unweighted co-expression networks were created from quality filtered and normalized expression data. Networks were generated for pairwise cocultures containing *B. thailandensis*. First, data were quality filtered as previously described (See section: *Quality filtering and differential gene expression analysis*). Then, normalized expression data was extracted from DESeq2. Biological replicates for each member within each timepoint were averaged by mean. Interspecies networks were then inferred from the expression data using the context likelihood of relatedness (Faith et al., 2007) algorithm within the R package Minet (Meyer et al., 2008). Gene matrices for each coculture pair were concatenated to perform the following analysis. Briefly, the mutual information coefficient was determined for each gene-pair. To ensure robust detection of co-expressed genes, a resampling approach was used as previously described (McClure et al., 2016). Then, a Z-score was computed on the mutual information matrix. A Z-score threshold of 4.5 was used to determine an edge in the interspecies network. Interspecies networks were uploaded into Cytoscape version 3.7.1. for visualization, topological analysis, and enrichment analysis (Shannon et al., 2003).

Gene annotation and gene ontology files were obtained for *B. thailandensis*, *P. syringae*, and *C. violaceum* for enrichment analyses. For *B. thailandensis*, annotation and ontology files were downloaded from the Burkholderia Genome Database (<https://www.burkholderia.com>). For *P. syringae*, annotation and ontology files were

downloaded from the Pseudomonas Genome Database (<http://www.pseudomonas.com/strain/download>). Annotation and ontology files for *C. violaceum* were generated using Blast2GO version 5.2.5 (Götz et al., 2008). InterProScan (Zdobnov and Apweiler, 2001) with default parameters were used to complement gene annotations from *C. violaceum*. GO terms were assigned using Blast2GO with default parameters. In addition, genes involved in secondary metabolism were manually curated and added to these files as individual GO terms. These genes were also used to update the GO term GO:0017000 (antibiotic biosynthetic process), composed of a collection of all the biosynthetic genes. (See section: *Biosynthetic gene cluster analysis*).

Topological analysis was performed as follows: Nodes were filtered from each coculture network to only select genes from one member. The GLayer community cluster function in Cytoscape was used to determine intra-member modules. Functional enrichment analysis was then performed on the modules using the BiNGO package in Cytoscape.

To determine interspecies co-regulation patterns, we filtered network nodes that contained an interspecies edge. Functional enrichment analysis was performed on the collection of genes containing interspecies edges for each member using the BiNGO package in Cytoscape. Modules of interest (e.g. thailandamide and malleilactone) were filtered in Cytoscape for visualization. The biosynthetic gene cluster organization of thailandamide and malleilactone were obtained from [Mibig](#) and drawn in InkScape.

Protein sequences from an interspecies gene of interest from the thailandamide module cluster (CLV\_2968) and an interspecies gene of interest from the malleilactone module cluster (PSPTO\_1206) were obtained. A protein blast for each protein was run against *B. thailandensis* protein sequences. *B. thailandensis* locus tags were extracted from the top blast hit from each run. Normalized transcript counts for these 4 genes of interest were plotted in R. Time course gene trajectories were determined using a loess smoothing function.

### *Non-additive gene expression*

The quality filtered and normalized expression matrix from each community member was used to extract log2 fold-change (LFC) values within DESeq2. LFCs were calculated by comparing transcript counts from each time point to its respective time point in the monoculture condition. LFCs were converted to fold-changes (FC). Non-additive outcomes were determined based on the null expectation that FCs in the 3-member community should reflect a summation of FCs from the pairwise cocultures. The thresholds for assigning a gene as non-additive upregulation was as follows:

$$(TM/MC)/(PWC1/MC+PWC2/MC) > 1.2$$

Where TM are the gene counts in the 3-member community, MC are the gene counts in the monoculture condition, and PWC1/PWC2 are the gene counts in the pairwise coculture conditions 1 & 2, respectively. Non-additive gene expression patterns were determined at each time point and plotted using ggplot2. Venn diagrams were also



created to analyze the patterns of non-additivity across the time series and between the exponential phase time point and stationary phase times points. Functional enrichment analysis was performed on the collection of genes determined to have non-additive upregulation using the BiNGO package in Cytoscape.

## Metabolomics

### *LCMS sample preparation and data acquisition*

Standard operating protocols were performed at the Department of Energy Joint Genome Institute as previously described (Chodkowski and Shade, 2020).

### *Feature detection*

MZmine2 (Pluskal et al., 2010) was used for feature detection and peak area integration as previously described (Chodkowski and Shade, 2017). Select exometabolites were identified in MZmine2 by manual observation of both MS and MS/MS data. We extracted quantities of these identified exometabolites for ANOVA and Tukey HSD post-hoc analysis in R.

### *Feature filtering and HM visualization*

We filtered features in three steps to identify coculture-accumulated exometabolites. The feature-filtering steps were performed as follows on a per-member basis: (i) retain features where the maximum peak area abundance occurred in a coculture community arrangement ; (ii) a noise filter, the minimum peak area of a

feature from a replicate at any time point needed to be 3 times the maximum peak area of the same feature in one of the external control replicates, was applied; (iii) coefficient of variation (CV) values for each feature calculated between replicates at each time point needed to be less than 20% across the time series.

Four final feature data sets from polar and nonpolar analyses in both ionization modes were analyzed in MetaboAnalyst 5.0 (Pang et al., 2021). Features were normalized by an ITSD reference feature (see Dataset 5 at [https://github.com/ShadeLab/Paper\\_Chodkowski\\_MonocultureExometabolites\\_2020/tree/master/Datasets](https://github.com/ShadeLab/Paper_Chodkowski_MonocultureExometabolites_2020/tree/master/Datasets)) and cube root transformed. Reference features for polar analyses in positive ( $[^{13}\text{C},^{15}\text{N}]$ proline) and negative ( $[^{13}\text{C},^{15}\text{N}]$ alanine) modes were determined by the ITSD with the lowest CV value across all samples. The reference feature for nonpolar data sets was the ITSD ABMBA. Heat maps were generated in MetaboAnalyst using Ward's clustering algorithm with Euclidean distances from Z-scored data. Data for each sample are the averages from independent time point replicates ( $n = 2$  to 4). Normalized and transformed data sets were exported from MetaboAnalyst to generate principal-coordinate analysis (PCoA) plots in R.

### *Principal coordinates analysis and statistics*

A distance matrix based on the Bray-Curtis dissimilarity metric was used to calculate dissimilarities between exometabolite profiles. Principal coordinates analysis was performed using the R package vegan. Principal coordinates were plotted using ggplot2. Coordinates of the first two PCoA axes were used to perform Procrustes analysis using the protest function in vegan. Dissimilarity matrices were used to perform

PERMANOVA and variation partitioning and using the `adonis` and `varpart` functions in `vegan`, respectively. The `RVAideMemoire` package was used to perform a post-hoc pairwise PERMANOVAs. Monoculture community arrangements were removed to focus on coculture trends.

### *Non-additive metabolomics production*

All reference standard normalized, filtered features (across both polarities and ionization modes) were combined. Non-additive outcomes were determined based on the null expectation that fold-changes (FC) in the 3-member community should reflect a summation of FCs from the pairwise cocultures. The thresholds for assigning a metabolomic feature as non-additive production was as follows:

$$(TM)/(PWC1 + PWC2 + PWC3) > 1.5$$

Where TM is the peak area abundance in the 3-member community, and PWC1/PWC2/PWC2 are the peak area abundance in the pairwise coculture conditions 1,2, and 3, respectively. FCs were determined at each time point. A feature was determined to be produced in the 3-member community in a non-additive manner if it was above the FC threshold at least 3 times during stationary phase. At each time point, a Z-scored distribution of FCs was plotted in R. Z-scores were extracted from exometabolite of interest (thailandamide, pyochelin, and capistrin) to plot as vertical ablines on the Z-scored distributions. In addition, the non-additive features were extracted from the dataset to generate a heat map in MetaboAnalyst. Ward's clustering

algorithm was used with Euclidean distances from Z-scored data. Data for each sample are the averages from independent time point replicates ( $n = 2$  to  $4$ ).

To find statistical support for non-additive exometabolite production in the 3-member community, we created an “expected” time course abundance for identified exometabolites that had non-additive upregulation (thailandamide, pyochelin, and capistrui). The “expected” time course abundance was determined by calculating the summation of peak abundances across pairwise cocultures with *B. thailandensis*. Due to the issue of replicate independence for each time course, the standard deviation would vary depending on what replicates were combined. As a conservative approach, we permuted all possible pairwise coculture combinations and used the replicate combination that resulted in the highest standard deviation. The time course peak abundance of thailandamide, pyochelin, and capistrui from pairwise cocultures with *B. thailandensis*, from the 3-member community, and from the “expected” 3-member community were plotted in ggplot2. We then ran a repeated measures permutation ANOVA to compare the time course peak abundance of thailandamide, pyochelin, and capistrui observed in the 3-member community to the “expected” 3-member community. A post-hoc pairwise t-test was performed to observe which time points were statistically significant. We note each iteration of repeated measures ANOVA would result in different statistical result. This was because the replicate identifiers for the “expected” time course were arbitrarily assigned. For this reason, we only considered a test significant if it was consistently below a P threshold of 0.05 across 10 iterations of the code.

## Code availability

Computing code, workflows, and data sets are available at [\[https://github.com/ShadeLab/Paper\\_Chodkowski\\_3member\\_SynCom\\_2021\]](https://github.com/ShadeLab/Paper_Chodkowski_3member_SynCom_2021). R packages used during computing analyses included DEseq2 (Love et al., 2014), ImpulseDE2 (Fischer et al., 2018), Minet (Meyer et al., 2008), vegan 2.5-4 (Oksanen et al., 2019), ggplot2 (Wickham, 2016), VennDiagram (Chen, 2018), RVAideMemoire (Herve, 2020), rtracklayer (Lawrence et al., 2009), viridis (Garnier et al., 2021), and helper functions (Wickham, 2007, Wickham, 2019; Wickham et al., 2019A; Wickham et al., 2019B).

## Data availability

Genomes for *B. thailandensis*, *C. violaceum*, and *P. syringae* are available at the National Center for Biotechnology Information (NCBI) under accession numbers [NC\\_007651](#) (Chromosome I)/[NC\\_007650](#) (Chromosome II), [NZ\\_PKBZ01000001](#), and [NC\\_004578](#) (Chromosome)/[NC\\_004633](#) (Plasmid A)/[NC\\_004632](#) (Plasmid B), respectively. An improved annotated draft genome of *C. violaceum* is available under NCBI BioProject accession number [PRJNA402426](#) (GenBank accession number [PKBZ000000000](#)). Data for resequencing efforts for *B. thailandensis* and *P. syringae* are under NCBI BioProject accession numbers [PRJNA402425](#) and [PRJNA402424](#), respectively. Metabolomics data and transcriptomics data are also available at the JGI Genome Portal (Nordberg et al., 2014) under JGI proposal identifier 502921. MZmine XML parameter files for all

analyses can be viewed at and downloaded from GitHub (see Dataset 7 at [https://github.com/ShadeLab/Paper\\_Chodkowski\\_MonocultureExometabolites\\_2020/tree/master/Datasets](https://github.com/ShadeLab/Paper_Chodkowski_MonocultureExometabolites_2020/tree/master/Datasets)). Large data files (e.g., MZmine project files) are available upon request. Supplementary files are also available on GitHub ([https://github.com/ShadeLab/Paper\\_Chodkowski\\_3member\\_SynCom\\_2021/tree/master/Supplemental\\_Files](https://github.com/ShadeLab/Paper_Chodkowski_3member_SynCom_2021/tree/master/Supplemental_Files)).

## Acknowledgements

This material is based upon work supported by the National Science Foundation under grant DEB 1749544 and by Michigan State University. In addition, metabolite analysis and transcript sequencing were provided by a DOE-JGI Community Science Program award (proposal identifier 502921). The work conducted by the U.S. Department of Energy Joint Genome Institute, a DOE Office of Science User Facility, is supported under contract number DE-AC02-05CH11231. J.L.C. was supported by the Eleanor L. Gilmore Fellowship from the Department of Microbiology and Molecular Genetics.

We thank Katherine B. Louie and Benjamin P. Bowen for support in mass spectral analysis.

## Competing Interests

We declare no competing interests.

## Author contributions

J.L.C. and A.S. conceived of and designed the study. J.L.C. performed the research and analyses. J.L.C. and A.S. wrote the manuscript.

## References

- Alice, A. F., López, C. S., Lowe, C. A., Ledesma, M. A., & Crosa, J. H. (2006). Genetic and transcriptional analysis of the siderophore malleobactin biosynthesis and transport genes in the human pathogen *Burkholderia pseudomallei* K96243. *Journal of Bacteriology*, 188(4), 1551–1566. <https://doi.org/10.1128/JB.188.4.1551-1566.2006>
- Amunts, A., Fiedorczuk, K., Truong, T. T., Chandler, J., Peter Greenberg, E., & Ramakrishnan, V. (2015). Bactobolin A binds to a site on the 70S ribosome distinct from previously seen antibiotics. *Journal of Molecular Biology*, 427(4), 753–755. <https://doi.org/10.1016/j.jmb.2014.12.018>
- Antwis, R. E., Griffiths, S. M., Harrison, X. A., Aranega-Bou, P., Arce, A., Bettridge, A. S., ... Sutherland, W. J. (2017). Fifty important research questions in microbial ecology. *FEMS Microbiology Ecology*, 93(5), fix044. <https://doi.org/10.1093/femsec/fix044>
- Aziz, F. A. A., Suzuki, K., Ohtaki, A., Sagegami, K., Hirai, H., Seno, J., ... Futamata, H. (2015). Interspecies interactions are an integral determinant of microbial community dynamics. *Frontiers in Microbiology*, 6, 1148. <https://doi.org/10.3389/fmicb.2015.01148>
- Bernier, S. P., & Surette, M. G. (2013). Concentration-dependent activity of antibiotics in natural environments. *Frontiers in Microbiology*, 4, 20. <https://doi.org/10.3389/fmicb.2013.00020>
- Biggins, J. B., Ternei, M. A., & Brady, S. F. (2012). Malleilactone, a polyketide synthase-derived virulence factor encoded by the cryptic secondary metabolome of *Burkholderia pseudomallei* group pathogens. *Journal of the American Chemical Society*, 134(32), 13192–13195. <https://doi.org/10.1021/ja3052156>
- Billick, I., & Case, T. J. (1994). Higher order interactions in ecological communities: What are they and how can they be detected? *Ecology*, 75(6), 1529–1543. <https://doi.org/10.2307/1939614>
- Blin, K., Shaw, S., Kloosterman, A. M., Charlop-Powers, Z., van Wezel, G. P., Medema, M. H., & Weber, T. (2021). antiSMASH 6.0: improving cluster detection and comparison capabilities. *Nucleic Acids Research*, 49(W1), W29–W35. <https://doi.org/10.1093/NAR/GKAB335>
- Bray, N. L., Pimentel, H., Melsted, P., & Pachter, L. (2016). Near-optimal probabilistic RNA-seq quantification. *Nature Biotechnology*, 34, 525–527. <https://doi.org/10.1038/nbt.3519>
- Brett, P. J., DeShazer, D., & Woods, D. E. (1998). *Burkholderia thailandensis* sp. nov., a *Burkholderia pseudomallei*-like species. *International Journal of Systematic Bacteriology*, 48 Pt 1(1), 317–320. <https://doi.org/10.1099/00207713-48-1-317>



- 989 Browning, D. F., & Busby, S. J. W. (2004). The regulation of bacterial transcription initiation. *Nature*  
990 *Reviews Microbiology*, 2(1), 57–65. <https://doi.org/10.1038/nrmicro787>
- 991 Buell, C. R., Joardar, V., Lindeberg, M., Selengut, J., Paulsen, I. T., Gwinn, M. L., ... Collmer, A. (2003).  
992 The complete genome sequence of the Arabidopsis and tomato pathogen *Pseudomonas syringae*  
993 pv. tomato DC3000. *Proceedings of the National Academy of Sciences*, 100(18), 10181–10186.  
994 <https://doi.org/10.1073/PNAS.1731982100>
- 995 Bundy, B. M., Collier, L. S., Hoover, T. R., & Neidle, E. L. (2002). Synergistic transcriptional activation by  
996 one regulatory protein in response to two metabolites. *Proceedings of the National Academy of*  
997 *Sciences of the United States of America*, 99(11), 7693–7698.  
998 <https://doi.org/10.1073/pnas.102605799>
- 999 Butt, A. T., & Thomas, M. S. (2017). Iron acquisition mechanisms and their role in the virulence of  
1000 Burkholderia species. *Frontiers in Cellular and Infection Microbiology*, 7, 460.  
1001 <https://doi.org/10.3389/fcimb.2017.00460>
- 1002 Chandler, J. R., Heilmann, S., Mittler, J. E., & Greenberg, E. P. (2012). Acyl-homoserine lactone-  
1003 dependent eavesdropping promotes competition in a laboratory co-culture model. *ISME Journal*,  
1004 6(12), 2219–2228. <https://doi.org/10.1038/ismej.2012.69>
- 1005 Chen, H. (2018). VennDiagram: Generate High-Resolution Venn and Euler Plots. R package version  
1006 1.6.20.
- 1007 Chesson, P. L. (1983). Coexistence of Competitors in a Stochastic Environment: The Storage  
1008 Effect. *Lecture Notes in Biomathematics*, 52, 188–198. [https://doi.org/10.1007/978-3-642-](https://doi.org/10.1007/978-3-642-87893-0_25)  
1009 [87893-0\\_25](https://doi.org/10.1007/978-3-642-87893-0_25)
- 1010 Chiesa, S. C., Irvine, R. L., & Manning, J. F. (1985). Feast/famine growth environments and activated  
1011 sludge population selection. *Biotechnology and Bioengineering*, 27(5), 562–568.  
1012 <https://doi.org/10.1002/bit.260270503>
- 1013 Chodkowski, J. L., & Shade, A. (2020). Exometabolite Dynamics over Stationary Phase Reveal Strain-  
1014 Specific Responses. *MSystems*, 5(6), e00493-20. <https://doi.org/10.1128/msystems.00493-20>
- 1015 Chodkowski, J. L., & Shade, A. (2017). A Synthetic Community System for Probing Microbial Interactions  
1016 Driven by Exometabolites. *MSystems*, 2(6), e00129-17. <https://doi.org/10.1128/msystems.00129-17>
- 1017 Čihák, M., Kameník, Z., Šmídová, K., Bergman, N., Benada, O., Kofronová, O., ... Bobek, J. (2017).  
1018 Secondary metabolites produced during the germination of *Streptomyces coelicolor*. *Frontiers in*  
1019 *Microbiology*, 8, 2495. <https://doi.org/10.3389/fmicb.2017.02495>
- 1020 Cornforth, D. M., & Foster, K. R. (2013). Competition sensing: The social side of bacterial stress  
1021 responses. *Nature Reviews Microbiology*, 11(4), 285–293. <https://doi.org/10.1038/nrmicro2977>
- 1022 Cornforth, D. M., Popat, R., McNally, L., Gurney, J., Scott-Phillips, T. C., Ivens, A., ... Brown, S. P.  
1023 (2014). Combinatorial quorum sensing allows bacteria to resolve their social and physical  
1024 environment. *Proceedings of the National Academy of Sciences of the United States of America*,  
1025 111(11), 4280–4284. <https://doi.org/10.1073/pnas.1319175111>
- 1026 Coyte, K. Z., Schluter, J., & Foster, K. R. (2015). The ecology of the microbiome: Networks, competition,  
1027 and stability. *Science*, 350(6261), 663–666. <https://doi.org/10.1126/science.aad2602>



- 1028 D'hoë, K., Vet, S., Faust, K., Moens, F., Falony, G., Gonze, D., ... Raes, J. (2018). Integrated culturing,  
1029 modeling and transcriptomics uncovers complex interactions and emergent behavior in a three-  
1030 species synthetic gut community. *ELife*, 7, e37090. <https://doi.org/10.7554/eLife.37090>
- 1031 De Jong, H., Casagrande, S., Giordano, N., Cinquemani, E., Ropers, D., Geiselmann, J., & Gouzé, J. L.  
1032 (2017). Mathematical modelling of microbes: Metabolism, gene expression and growth. *Journal of*  
1033 *the Royal Society Interface*, 14(136), 20170502. <https://doi.org/10.1098/rsif.2017.0502>
- 1034 De Roy, K., Marzorati, M., Van den Abbeele, P., Van de Wiele, T., & Boon, N. (2014). Synthetic microbial  
1035 ecosystems: an exciting tool to understand and apply microbial communities. *Environmental*  
1036 *Microbiology*, 16(6), 1472–1481. <https://doi.org/10.1111/1462-2920.12343>
- 1037 Dubeau, D., Déziel, E., Woods, D. E., & Lépine, F. (2009). Burkholderia thailandensis harbors two  
1038 identical rhl gene clusters responsible for the biosynthesis of rhamnolipids. *BMC Microbiology*, 9(1),  
1039 1–12. <https://doi.org/10.1186/1471-2180-9-263>
- 1040 Duerkop, B. A., Varga, J., Chandler, J. R., Peterson, S. B., Herman, J. P., Churchill, M. E. A., ...  
1041 Greenberg, E. P. (2009). Quorum-sensing control of antibiotic synthesis in Burkholderia  
1042 thailandensis. *Journal of Bacteriology*, 191(12), 3909–3918. <https://doi.org/10.1128/JB.00200-09>
- 1043 Estrela, S., Sanchez-Gorostiaga, A., Vila, J. C. C., & Sanchez, A. (2021). Nutrient dominance governs the  
1044 assembly of microbial communities in mixed nutrient environments. *ELife*, 10, e65948.  
1045 <https://doi.org/10.7554/eLife.65948>
- 1046 Evans, K. C., Benomar, S., Camuy-Vélez, L. A., Nasser, E. B., Wang, X., Neuenswander, B., & Chandler,  
1047 J. R. (2018). Quorum-sensing control of antibiotic resistance stabilizes cooperation in  
1048 Chromobacterium violaceum. *ISME J*, 12(5), 1263–1272. [https://doi.org/10.1038/s41396-018-0047-](https://doi.org/10.1038/s41396-018-0047-7)  
1049 7
- 1050 Faith, J. J., Hayete, B., Thaden, J. T., Mogno, I., Wierzbowski, J., Cottarel, G., ... Gardner, T. S. (2007).  
1051 Large-scale mapping and validation of Escherichia coli transcriptional regulation from a  
1052 compendium of expression profiles. *PLoS Biology*, 5(1), e8.  
1053 <https://doi.org/10.1371/journal.pbio.0050008>
- 1054 Fetissov, S. O. (2017). Role of the gut microbiota in host appetite control: Bacterial growth to animal  
1055 feeding behaviour. *Nature Reviews Endocrinology*, 13(1), 11–25.  
1056 <https://doi.org/10.1038/nrendo.2016.150>
- 1057 Fischer, D. S., Theis, F. J., & Yosef, N. (2018). Impulse model-based differential expression analysis of  
1058 time course sequencing data. *Nucleic Acids Research*, 46(20), 119.  
1059 <https://doi.org/10.1093/nar/gky675>
- 1060 Foster, K. R., & Bell, T. (2012). Competition, not cooperation, dominates interactions among culturable  
1061 microbial species. *Current Biology*, 22(19), 1845–1850. <https://doi.org/10.1016/j.cub.2012.08.005>
- 1062 Garnier, S., Ross, N., Rudis, R., Camargo, P. A., Sciaini, M., & Scherer, C. (2021). viridis - Colorblind-  
1063 Friendly Color Maps for R, R package, <https://sjmgarnier.github.io/viridis/>.  
1064 <https://doi.org/10.5281/zenodo.4679424>
- 1065 Garren, M., Son, K., Tout, J., Seymour, J. R., & Stocker, R. (2016). Temperature-induced behavioral  
1066 switches in a bacterial coral pathogen. *ISME Journal*, 10(6), 1363–1372.  
1067 <https://doi.org/10.1038/ismej.2015.216>

- 1068 Ghoul, M., & Mitri, S. (2016). The Ecology and Evolution of Microbial Competition. *Trends in Microbiology*,  
1069 24(10), 833–845. <https://doi.org/10.1016/j.tim.2016.06.011>
- 1070 Goh, E. B., Yim, G., Tsui, W., McClure, J. A., Surette, M. G., & Davies, J. (2002). Transcriptional  
1071 modulation of bacterial gene expression by subinhibitory concentrations of antibiotics. *Proceedings*  
1072 *of the National Academy of Sciences of the United States of America*, 99(26), 17025–17030.  
1073 <https://doi.org/10.1073/pnas.252607699>
- 1074 Götz, S., García-Gómez, J. M., Terol, J., Williams, T. D., Nagaraj, S. H., Nueda, M. J., ... Conesa, A.  
1075 (2008). High-throughput functional annotation and data mining with the Blast2GO suite. *Nucleic*  
1076 *Acids Research*, 36(10), 3420–3435. <https://doi.org/10.1093/nar/gkn176>
- 1077 Großkopf, T., & Soyer, O. S. (2014). Synthetic microbial communities. *Current Opinion in Microbiology*,  
1078 18(1), 72–77. <https://doi.org/10.1016/j.mib.2014.02.002>
- 1079 Gupta, A., Bedre, R., Thapa, S. S., Sabrin, A., Wang, G., Dassanayake, M., & Grove, A. (2017). Global  
1080 Awakening of Cryptic Biosynthetic Gene Clusters in Burkholderia thailandensis. *ACS Chemical*  
1081 *Biology*, 12(12), 3012–3021. <https://doi.org/10.1021/acscchembio.7b00681>
- 1082 Herve M. (2020). RVAideMemoire: testing and plotting procedures for biostatistics. R Packag version 09-  
1083 77.
- 1084 Hibbing, M. E., Fuqua, C., Parsek, M. R., & Peterson, S. B. (2010). Bacterial competition: Surviving and  
1085 thriving in the microbial jungle. *Nature Reviews Microbiology*, 8(1), 15–25.  
1086 <https://doi.org/10.1038/nrmicro2259>
- 1087 Hiltunen, T., Laakso, J., Kaitala, V., Suomalainen, L. R., & Pekkonen, M. (2008). Temporal variability in  
1088 detritus resource maintains diversity of bacterial communities. *Acta Oecologica*, 33(3), 291–299.  
1089 <https://doi.org/10.1016/j.actao.2007.12.002>
- 1090 Holt, R. D. (2008). Theoretical perspectives on resource pulses. *Ecology*, 89(3), 671–681.  
1091 <https://doi.org/10.1890/07-0348.1>
- 1092 Ishida, K., Lincke, T., Behnken, S., & Hertweck, C. (2010). Induced biosynthesis of cryptic polyketide  
1093 metabolites in a Burkholderia thailandensis quorum sensing mutant. *Journal of the American*  
1094 *Chemical Society*, 132(40), 13966–13968. <https://doi.org/10.1021/ja105003g>
- 1095 Jöers, A., Liske, E., & Tenson, T. (2020). Dividing subpopulation of Escherichia coli in stationary phase.  
1096 *Research in Microbiology*, 171(3–4), 153–157. <https://doi.org/10.1016/j.resmic.2020.02.002>
- 1097 Karas, V. O., Westerlaken, I., & Meyer, A. S. (2015). The DNA-binding protein from starved cells (Dps)  
1098 utilizes dual functions to defend cells against multiple stresses. *Journal of Bacteriology*, 197(19),  
1099 3206–3215. <https://doi.org/10.1128/JB.00475-15>
- 1100 Kato, S., Haruta, S., Cui, Z. J., Ishii, M., & Igarashi, Y. (2005). Stable coexistence of five bacterial strains  
1101 as a cellulose-degrading community. *Applied and Environmental Microbiology*, 71(11), 7099–7106.  
1102 <https://doi.org/10.1128/AEM.71.11.7099-7106.2005>
- 1103 Kautsar, S. A., Blin, K., Shaw, S., Navarro-Muñoz, J. C., Terlouw, B. R., van der Hooft, J. J. J., ...  
1104 Medema, M. H. (2020). MIBiG 2.0: a repository for biosynthetic gene clusters of known function.  
1105 *Nucleic Acids Research*, 48(D1), D454–D458. <https://doi.org/10.1093/NAR/GKZ882>

- 1106 Kell, D. B., Brown, M., Davey, H. M., Dunn, W. B., Spasic, I., & Oliver, S. G. (2005). Metabolic footprinting  
1107 and systems biology: The medium is the message. *Nature Reviews Microbiology*, 3(7), 557–565.  
1108 <https://doi.org/10.1038/nrmicro1177>
- 1109 Knappe, T. A., Linne, U., Zirah, S., Rebuffat, S., Xie, X., & Marahiel, M. A. (2008). Isolation and structural  
1110 characterization of capistruin, a lasso peptide predicted from the genome sequence of Burkholderia  
1111 thailandensis E264. *Journal of the American Chemical Society*, 130(34), 11446–11454.  
1112 <https://doi.org/10.1021/ja802966g>
- 1113 Konopka, A. (2009). What is microbial community ecology. *ISME J*, 3(11), 1223–1230.  
1114 <https://doi.org/10.1038/ismej.2009.88>
- 1115 Kuznedelov, K., Semenova, E., Knappe, T. A., Mukhamedyarov, D., Srivastava, A., Chatterjee, S., ...  
1116 Severinov, K. (2011). The antibacterial threaded-lasso peptide capistruin inhibits bacterial RNA  
1117 polymerase. *Journal of Molecular Biology*, 412(5), 842–848.  
1118 <https://doi.org/10.1016/j.jmb.2011.02.060>
- 1119 Lawrence, M., Gentleman, R., & Carey, V. (2009). rtracklayer: An R package for interfacing with genome  
1120 browsers. *Bioinformatics*, 25(14), 1841–1842. <https://doi.org/10.1093/bioinformatics/btp328>
- 1121 Li, A., Mao, D., Yoshimura, A., Rosen, P. C., Martin, W. L., Gallant, É., ... Seyedsayamdost, M. R. (2020).  
1122 Multi-omic analyses provide links between low-dose antibiotic treatment and induction of secondary  
1123 metabolism in Burkholderia thailandensis. *MBio*, 11(1), e03210-19.  
1124 <https://doi.org/10.1128/mBio.03210-19>
- 1125 Little, A. E. F., Robinson, C. J., Peterson, S. B., Raffa, K. F., & Handelsman, J. (2008). Rules of  
1126 engagement: Interspecies interactions that regulate microbial communities. *Annual Review of*  
1127 *Microbiology*, 62, 375–401. <https://doi.org/10.1146/annurev.micro.030608.101423>
- 1128 Love, M. I., Huber, W., & Anders, S. (2014). Moderated estimation of fold change and dispersion for RNA-  
1129 seq data with DESeq2. *Genome Biology*, 15, 550. <https://doi.org/10.1186/s13059-014-0550-8>
- 1130 Maere, S., Heymans, K., & Kuiper, M. (2005). BiNGO: a Cytoscape plugin to assess overrepresentation  
1131 of gene ontology categories in biological networks. *Bioinformatics (Oxford, England)*, 21(16), 3448–  
1132 3449. <https://doi.org/10.1093/BIOINFORMATICS/BTI551>
- 1133 Mao, D., Bushin, L. B., Moon, K., Wu, Y., & Seyedsayamdost, M. R. (2017). Discovery of scmR as a  
1134 global regulator of secondary metabolism and virulence in Burkholderia thailandensis E264.  
1135 *Proceedings of the National Academy of Sciences of the United States of America*, 114(14), E2920–  
1136 E2928. <https://doi.org/10.1073/pnas.1619529114>
- 1137 McCall, I. C., Shah, N., Govindan, A., Baquero, F., & Levin, B. R. (2019). Antibiotic killing of diversely  
1138 generated populations of nonreplicating bacteria. *Antimicrobial Agents and Chemotherapy*, 63(7),  
1139 e02360-18. <https://doi.org/10.1128/AAC.02360-18>
- 1140 McClure, R. S. (2019). Toward a Better Understanding of Species Interactions through Network Biology.  
1141 *MSystems*, 4(3), e00114-19. <https://doi.org/10.1128/msystems.00114-19>
- 1142 McClure, R. S., Overall, C. C., Hill, E. A., Song, H.-S., Charania, M., Bernstein, H. C., ... Beliaev, A. S.  
1143 (2018). Species-specific transcriptomic network inference of interspecies interactions. *ISME J*,  
1144 12(8), 2011–2023. <https://doi.org/10.1038/s41396-018-0145-6>

- 1145 McClure, R. S., Overall, C. C., Mcdermott, J. E., Hill, E. A., Markillie, L. M., Mccue, L. A., ... Beliaev, A. S.  
1146 (2016). Network analysis of transcriptomics expands regulatory landscapes in *Synechococcus* sp.  
1147 PCC 7002. *Nucleic Acids Research*, 44(18), 8810–8825. <https://doi.org/10.1093/nar/gkw737>
- 1148 Medema, M. H., Kottmann, R., Yilmaz, P., Cummings, M., Biggins, J. B., Blin, K., ... Glöckner, F. O.  
1149 (2015). Minimum Information about a Biosynthetic Gene cluster. *Nature Chemical Biology*, 11(9),  
1150 625–631. <https://doi.org/10.1038/nchembio.1890>
- 1151 Megan Steinweg, J., Dukes, J. S., Paul, E. A., & Wallenstein, M. D. (2013). Microbial responses to multi-  
1152 factor climate change: Effects on soil enzymes. *Frontiers in Microbiology*, 4, 146.  
1153 <https://doi.org/10.3389/fmicb.2013.00146>
- 1154 Meyer, P. E., Lafitte, F., & Bontempi, G. (2008). Minet: A r/bioconductor package for inferring large  
1155 transcriptional networks using mutual information. *BMC Bioinformatics*, 9(1), 461.  
1156 <https://doi.org/10.1186/1471-2105-9-461>
- 1157 Mickalide, H., & Kuehn, S. (2019). Higher-Order Interaction between Species Inhibits Bacterial Invasion of  
1158 a Phototroph-Predator Microbial Community. *Cell Systems*, 9(6), 521-533.e10.  
1159 <https://doi.org/10.1016/j.cels.2019.11.004>
- 1160 Miller, T. E., Burns, J. H., Munguia, P., Walters, E. L., Kneitel, J. M., Richards, P. M., ... Buckley, H. L.  
1161 (2005). A critical review of twenty years' use of the resource-ratio theory. *American Naturalist*,  
1162 165(4), 439–448. <https://doi.org/10.1086/428681>
- 1163 Momeni, B., Xie, L., & Shou, W. (2017). Lotka-Volterra pairwise modeling fails to capture diverse pairwise  
1164 microbial interactions. *ELife*, 6, e25051. <https://doi.org/10.7554/eLife.25051.001>
- 1165 Morin, M., Pierce, E. C., & Dutton, R. J. (2018). Changes in the genetic requirements for microbial  
1166 interactions with increasing community complexity. *ELife*, 7, e37072.  
1167 <https://doi.org/10.7554/eLife.37072>
- 1168 Nair, S., & Finkel, S. E. (2004). Dps protects cells against multiple stresses during stationary phase.  
1169 *Journal of Bacteriology*, 186(13), 4192–4198. <https://doi.org/10.1128/JB.186.13.4192-4198.2004>
- 1170 Navarro Llorens, J. M., Tormo, A., & Martínez-García, E. (2010). Stationary phase in gram-negative  
1171 bacteria. *FEMS Microbiology Reviews*, 34(4), 476–495. <https://doi.org/10.1111/j.1574-6976.2010.00213.x>
- 1173 Netzker, T., Fischer, J., Weber, J., Mattern, D. J., König, C. C., Valiante, V., ... Brakhage, A. A. (2015).  
1174 Microbial communication leading to the activation of silent fungal secondary metabolite gene  
1175 clusters. *Frontiers in Microbiology*. Frontiers Media S.A. <https://doi.org/10.3389/fmicb.2015.00299>
- 1176 Nordberg, H., Cantor, M., Dusheyko, S., Hua, S., Poliakov, A., Shabalov, I., ... Dubchak, I. (2014). The  
1177 genome portal of the Department of Energy Joint Genome Institute: 2014 updates. *Nucleic Acids*  
1178 *Research*, 42, D26-31. <https://doi.org/10.1093/nar/gkt1069>
- 1179 Okada, B. K., & Seyedsayamdost, M. R. (2017). Antibiotic dialogues: Induction of silent biosynthetic gene  
1180 clusters by exogenous small molecules. *FEMS Microbiology Reviews*, 41(1), 19–33.  
1181 <https://doi.org/10.1093/femsre/fuw035>
- 1182 Okada, B. K., Wu, Y., Mao, D., Bushin, L. B., & Seyedsayamdost, M. R. (2016). Mapping the  
1183 Trimethoprim-Induced Secondary Metabolome of *Burkholderia thailandensis*. *ACS Chemical*  
1184 *Biology*, 11(8), 2124–2130. <https://doi.org/10.1021/acschembio.6b00447>

- 1185 Oksanen, J., Blanchet, F. G., Friendly, M., Kindt, R., Legendre, P., McGlinn, D., ... Wagner, H. (2019).  
1186 vegan: Community Ecology Package. R package version 2.5-4.
- 1187 Orr, J. A., Vinebrooke, R. D., Jackson, M. C., Kroeker, K. J., Kordas, R. L., Mantyka-Pringle, C., ...  
1188 Piggott, J. J. (2020). Towards a unified study of multiple stressors: Divisions and common goals  
1189 across research disciplines. *Proceedings of the Royal Society B: Biological Sciences*, 287(1926),  
1190 20200421. <https://doi.org/10.1098/rspb.2020.0421>
- 1191 Ortiz, A., Vega, N. M., Ratzke, C., & Gore, J. (2021). Interspecies bacterial competition regulates  
1192 community assembly in the *C. elegans* intestine. *ISME J*, 1–15. [https://doi.org/10.1038/s41396-021-](https://doi.org/10.1038/s41396-021-00910-4)  
1193 00910-4
- 1194 Pacheco, A. R., Osborne, M. L., & Segrè, D. (2021). Non-additive microbial community responses to  
1195 environmental complexity. *Nature Communications*, 12(1), 1–11. [https://doi.org/10.1038/s41467-](https://doi.org/10.1038/s41467-021-22426-3)  
1196 021-22426-3
- 1197 Pang, Z., Chong, J., Zhou, G., de Lima Morais, D. A., Chang, L., Barrette, M., ... Xia, J. (2021).  
1198 MetaboAnalyst 5.0: narrowing the gap between raw spectra and functional insights. *Nucleic Acids*  
1199 *Research*, (1), gkab382. <https://doi.org/10.1093/nar/gkab382>
- 1200 Pekkonen, M., Korhonen, J., & Laakso, J. T. (2011). Increased survival during famine improves fitness of  
1201 bacteria in a pulsed-resource environment. *Evolutionary Ecology Research* (Vol. 13). Evolutionary  
1202 Ecology, Ltd.
- 1203 Pettit, R. K. (2009). Mixed fermentation for natural product drug discovery. *Applied Microbiology and*  
1204 *Biotechnology*, 83(1), 19–25. <https://doi.org/10.1007/s00253-009-1916-9>
- 1205 Phelan, V. V., Liu, W.-T., Pogliano, K., & Dorrestein, P. C. (2011). Microbial metabolic exchange--the  
1206 chemotype-to-phenotype link. *Nature Chemical Biology*, 8(1), 26–35.  
1207 <https://doi.org/10.1038/nchembio.739>
- 1208 Pietschke, C., Treitz, C., Forêt, S., Schultze, A., Künzel, S., Tholey, A., ... Fraune, S. (2017). Host  
1209 modification of a bacterial quorum-sensing signal induces a phenotypic switch in bacterial  
1210 symbionts. *Proceedings of the National Academy of Sciences of the United States of America*,  
1211 114(40), E8488–E8497. <https://doi.org/10.1073/pnas.1706879114>
- 1212 Pinu, F. R., & Villas-Boas, S. G. (2017). Extracellular microbial metabolomics: The state of the art.  
1213 *Metabolites*, 7(3), 43. <https://doi.org/10.3390/metabo7030043>
- 1214 Pluskal, T., Castillo, S., Villar-Briones, A., & Orešič, M. (2010). MZmine 2: Modular framework for  
1215 processing, visualizing, and analyzing mass spectrometry-based molecular profile data. *BMC*  
1216 *Bioinformatics*, 11, 395. <https://doi.org/10.1186/1471-2105-11-395>
- 1217 Sanchez-Gorostiaga, A., Bajić, D., Osborne, M. L., Poyatos, J. F., & Sanchez, A. (2019). High-order  
1218 interactions distort the functional landscape of microbial consortia. *PLoS Biology*, 17(12), e3000550.  
1219 <https://doi.org/10.1371/journal.pbio.3000550>
- 1220 Schimel, J. P. (2018). Life in dry soils: Effects of drought on soil microbial communities and processes.  
1221 *Annual Review of Ecology, Evolution, and Systematics*, 49, 409–432.  
1222 <https://doi.org/10.1146/annurev-ecolsys-110617-062614>



- 1223 Shannon, P., Markiel, A., Ozier, O., Baliga, N. S., Wang, J. T., Ramage, D., ... Ideker, T. (2003).  
1224 Cytoscape: A software Environment for integrated models of biomolecular interaction networks.  
1225 *Genome Research*, 13(11), 2498–2504. <https://doi.org/10.1101/gr.1239303>
- 1226 Silva, L. P., & Northen, T. R. (2015). Exometabolomics and MSI: Deconstructing how cells interact to  
1227 transform their small molecule environment. *Current Opinion in Biotechnology*, 34, 209–216.  
1228 <https://doi.org/10.1016/j.copbio.2015.03.015>
- 1229 Smith, H. L. (2011). Bacterial competition in serial transfer culture. *Mathematical Biosciences*, 229(2),  
1230 149–159. <https://doi.org/10.1016/j.mbs.2010.12.001>
- 1231 Stewart, F. M., & Levin, B. R. (1973). Partitioning of Resources and the Outcome of Interspecific  
1232 Competition: A Model and Some General Considerations. *The American Naturalist*, 107(954), 171–  
1233 198. <https://doi.org/10.1086/282825>
- 1234 Stock, A. M., Robinson, V. L., & Goudreau, P. N. (2000). Two-component signal transduction. *Annual*  
1235 *Review of Biochemistry*. Annual Reviews 4139 El Camino Way, P.O. Box 10139, Palo Alto, CA  
1236 94303-0139, USA. <https://doi.org/10.1146/annurev.biochem.69.1.183>
- 1237 Stock, A. M., Robinson, V. L., & Goudreau, P. N. (2000). Two-component signal transduction. *Annual*  
1238 *Review of Biochemistry*, 69, 183–215. <https://doi.org/10.1146/annurev.biochem.69.1.183>
- 1239 Tilman, D. (1982). *Resource Competition and Community Structure*. Princeton, NJ, U.S.A.: Princeton  
1240 University Press.
- 1241 Truong, T. T., Seyedsayamdost, M., Greenberg, E. P., & Chandler, J. R. (2015). A Burkholderia  
1242 thailandensis acyl-homoserine lactone-independent orphan LuxR homolog that activates production  
1243 of the cytotoxin malleilactone. *Journal of Bacteriology*, 197(21), 3456–3462.  
1244 <https://doi.org/10.1128/JB.00425-15>
- 1245 Wells, J. S., Trejo, W. H., Principe, P. A., Bush, K., Georgopapadakou, N., Bonner, D. P., & Sykes, R. B.  
1246 (1982). SQ 26,180, a novel monobactam. I Taxonomy, fermentation and biological properties. The  
1247 *Journal of Antibiotics*, 35(2), 184–188. <https://doi.org/10.7164/ANTIBIOTICS.35.184>
- 1248 Wickham, H. (2016). *ggplot2: Elegant Graphics for Data Analysis*. Springer-Verlag New York.
- 1249 Wickham, H. (2019). *stringr: Simple, Consistent Wrappers for Common String Operations*. R package  
1250 version 1.4.0.
- 1251 Wickham, H. (2007). Reshaping data with the reshape package. *Journal of Statistical Software*, 21(12),  
1252 1–20. <https://doi.org/10.18637/jss.v021.i12>
- 1253 Wickham, H., Averick, M., Bryan, J., Chang, W., McGowan, L., François, R., ... Yutani, H. (2019).  
1254 Welcome to the Tidyverse. *Journal of Open Source Software*, 4(43), 1686.  
1255 <https://doi.org/10.21105/joss.01686>
- 1256 Wickham, H., François, R., Henry, L., & Müller, K. (2019). *dplyr: A Grammar of Data Manipulation*. R  
1257 package version 0.8.3.
- 1258 Wozniak, C. E., Lin, Z., Schmidt, E. W., Hughes, K. T., & Liou, T. G. (2018). Thailandamide, a fatty acid  
1259 synthesis antibiotic that is coexpressed with a resistant target gene. *Antimicrobial Agents and*  
1260 *Chemotherapy*, 62(9), e00463-18. <https://doi.org/10.1128/AAC.00463-18>

Chodkowski & Shade: Exometabolite-driven maintenance competition in bacteria

- 1261 Zdobnov, E. M., & Apweiler, R. (2001). InterProScan - An integration platform for the signature-  
 1262 recognition methods in InterPro. *Bioinformatics*, 17(9), 847–848.  
 1263 <https://doi.org/10.1093/bioinformatics/17.9.847>
- 1264 Zhu, H., Sandiford, S. K., & Van Wezel, G. P. (2014). Triggers and cues that activate antibiotic production  
 1265 by actinomycetes. *Journal of Industrial Microbiology and Biotechnology*, 41(2), 371–386.  
 1266 <https://doi.org/10.1007/s10295-013-1309-z>

1267
